# Supplementary material for: Constituents of Pulicaria inuloides and Cytotoxic Activities of Two Methoxylated Flavonols
Source: MDPI journal article supplement (doi:10.3390/molecules28020480), 2023-01-04
Supplement: s1 [file s1]

# Constituents of *Pulicaria inuloides* and cytotoxic activities of two methoxylated flavonols

Janusz Malarz, Klaudia Michalska, Agnieszka Galanty, Anna K. Kiss and Anna Stojakowska

## SUPPLEMENTARY MATERIAL

**Figure S1.** LRESIMS and HRESIMS of compound **2**.

**Figure S2.**  $^1\text{H}$  NMR spectrum of compound **2** in  $\text{CDCl}_3$ .

**Figure S3.**  $^{13}\text{C}$  NMR spectrum of compound **2** in  $\text{CDCl}_3$ .

**Figure S4.**  $^1\text{H}$ - $^1\text{H}$  COSY spectrum of compound **2**.

**Figure S5.** COSY correlations for compound **2**.

**Figure S6.** NOESY spectrum of compound **2**.

**Figure S7.** HSQC spectrum of compound **2**.

**Figure S8.** HMBC spectrum of compound **2**.

**Figure S9.** HMBC correlations for compound **2**.

**Figure S10.**  $^1\text{H}$  NMR spectrum of compound **9** in  $\text{CDCl}_3$ .

**Figure S11.**  $^{13}\text{C}$  NMR spectrum of compound **9** in  $\text{CDCl}_3$ .

**Figure S12.**  $^1\text{H}$ - $^1\text{H}$  COSY spectrum of compound **9**.

**Figure S13.** NOESY spectrum of compound **9**.

**Figure S14.** HSQC spectrum of compound **9**.

**Figure S15.** HMBC spectrum of compound **9**.

**Figure S16.**  $^1\text{H}$  NMR spectrum of the mixture containing compound **3** in  $\text{CDCl}_3$ .

**Figure S17.**  $^1\text{H}$  NMR spectrum of compound **7** in  $\text{CDCl}_3$ .

**Figure S18.**  $^1\text{H}$  NMR spectrum of compound **8** in  $\text{CDCl}_3$ .

**Figure S19.**  $^1\text{H}$  NMR spectrum of compound **1** in  $\text{CDCl}_3$ .

**Figure S20.**  $^1\text{H}$  NMR spectrum of compound **4** in  $\text{CDCl}_3$ .

**Figure S21.**  $^1\text{H}$  NMR spectrum of compound **5** in  $\text{CDCl}_3$ .

**Figure S22.**  $^1\text{H}$  NMR spectrum of compound **6** in  $\text{CDCl}_3$ .

**Figure S23.**  $^1\text{H}$  NMR spectrum of compound **10** in  $\text{CDCl}_3$ .

**Figure S24.**  $^1\text{H}$  NMR spectrum of compound **11** in  $\text{CDCl}_3$ .

**Figure S25.**  $^1\text{H}$  NMR spectrum of compound **12** in  $\text{CDCl}_3$ .

**Figure S26.**  $^1\text{H}$  NMR spectrum of compound **13** in  $\text{CDCl}_3$ .

**Figure S27.**  $^1\text{H}$  NMR spectrum of compound **13** in  $\text{DMSO-d}_6$ .

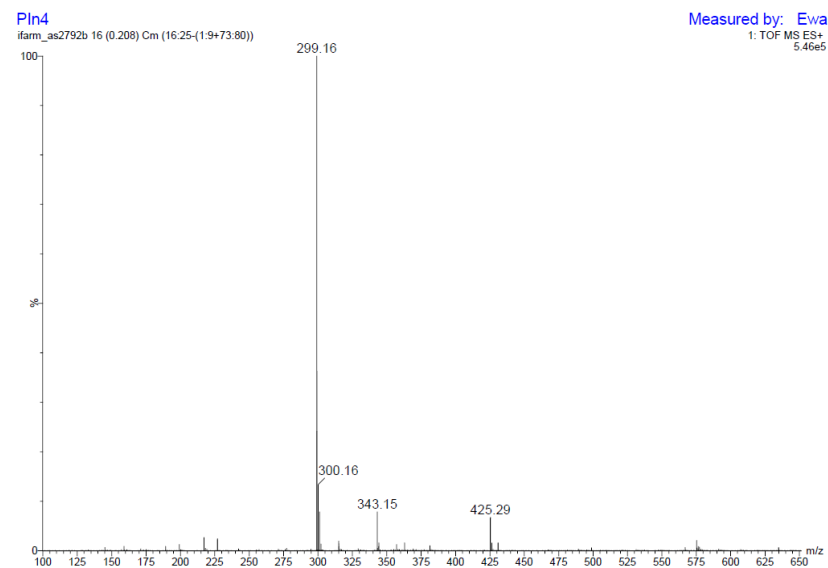

### Single Mass Analysis

Tolerance = 3.0 PPM / DBE: min = -1.5, max = 50.0

Element prediction: Off

Number of isotope peaks used for i-FIT = 3

Monoisotopic Mass, Even Electron Ions

48 formula(e) evaluated with 1 results within limits (up to 50 best isotopic matches for each mass)

Elements Used:

C: 0-200

H: 0-200

O: 0-5

Na: 0-1

| Mass     | Calc. Mass | mDa  | PPM  | DBE | Formula       | i-FIT  | i-FIT Norm | Fit Conf % | C  | H  | O | Na |
|----------|------------|------|------|-----|---------------|--------|------------|------------|----|----|---|----|
| 299.1620 | 299.1623   | -0.3 | -1.0 | 5.5 | C17 H24 O3 Na | 1171.9 | n/a        | n/a        | 17 | 24 | 3 | 1  |

**Figure S1.** LRESIMS and HRESIMS of compound **2**.

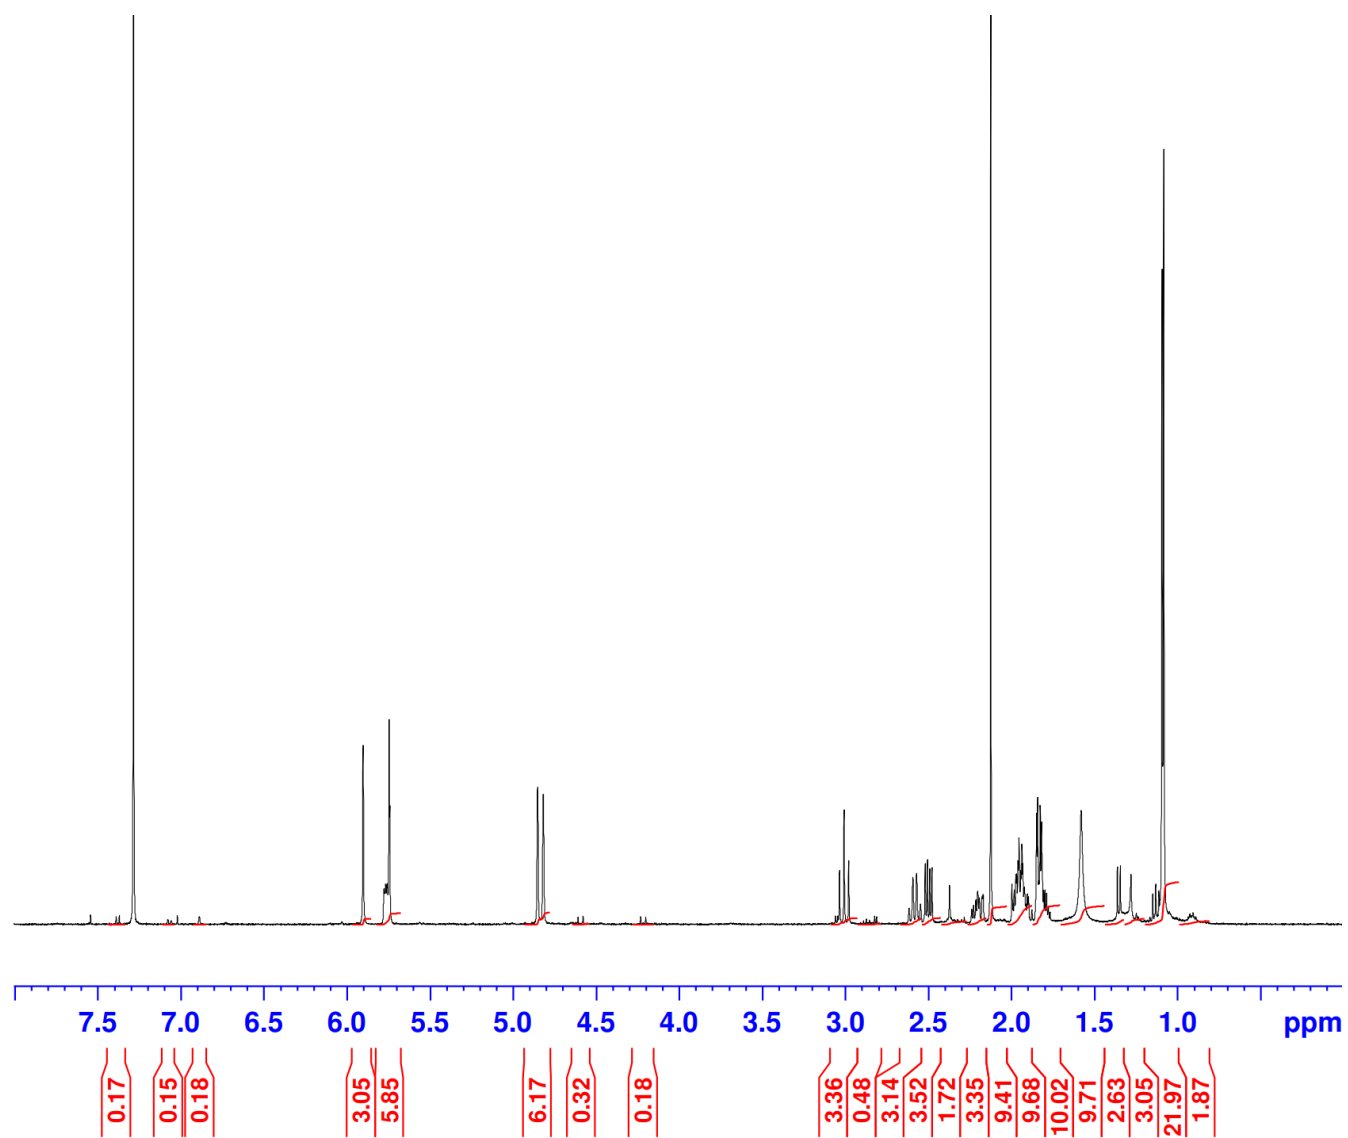

**Figure S2.**  $^1\text{H}$  NMR spectrum of compound **2** in  $\text{CDCl}_3$ .

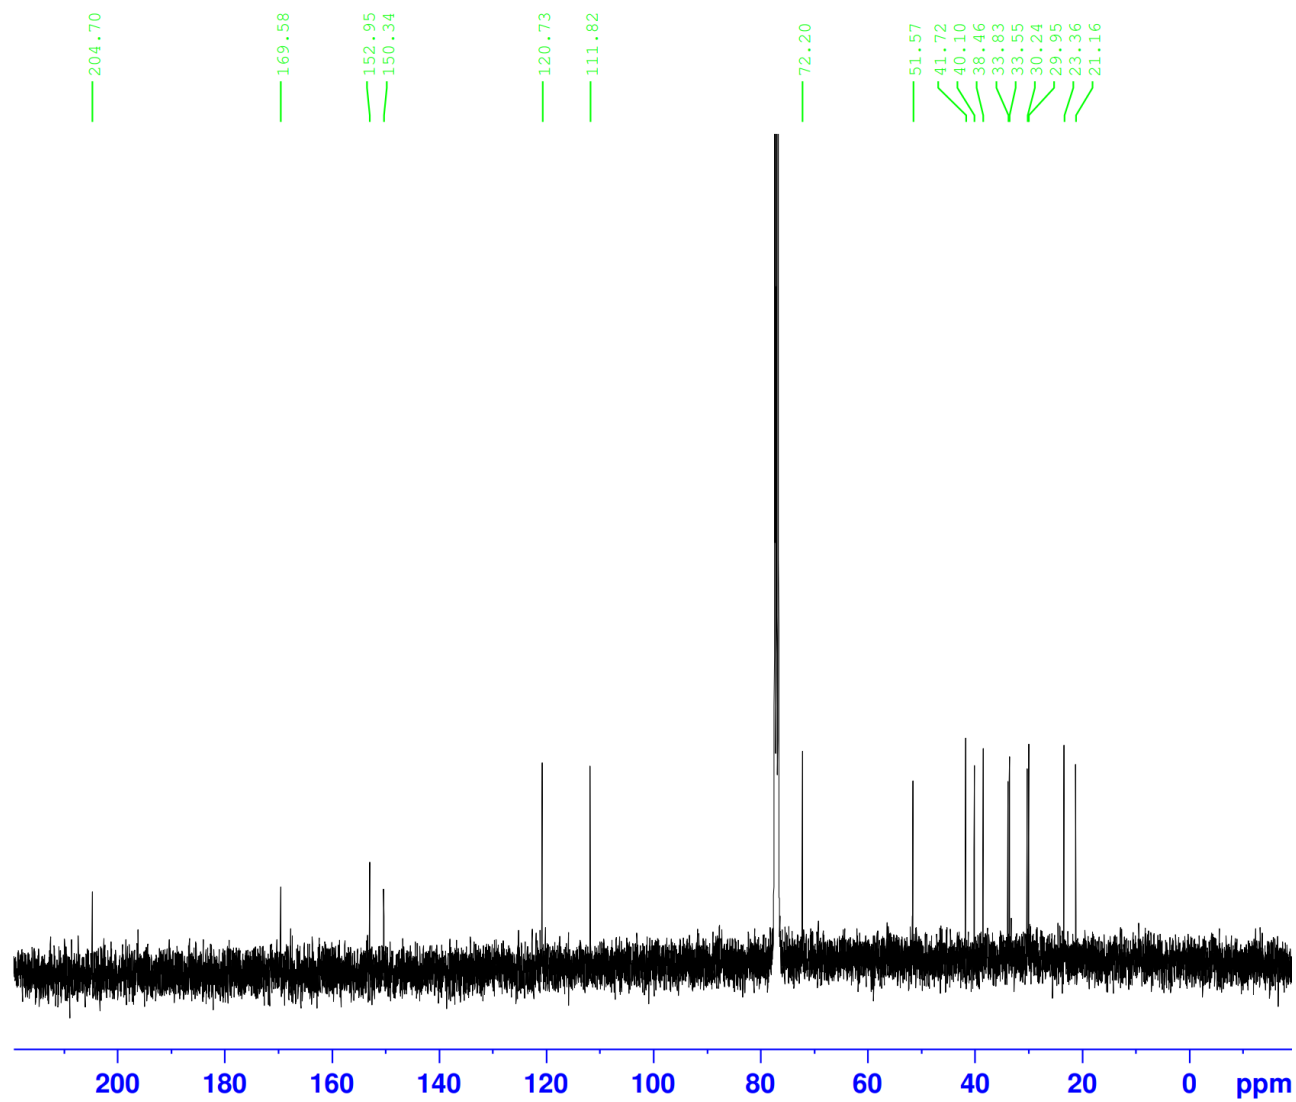

**Figure S3.** <sup>13</sup>C NMR spectrum of compound **2** in CDCl<sub>3</sub>.

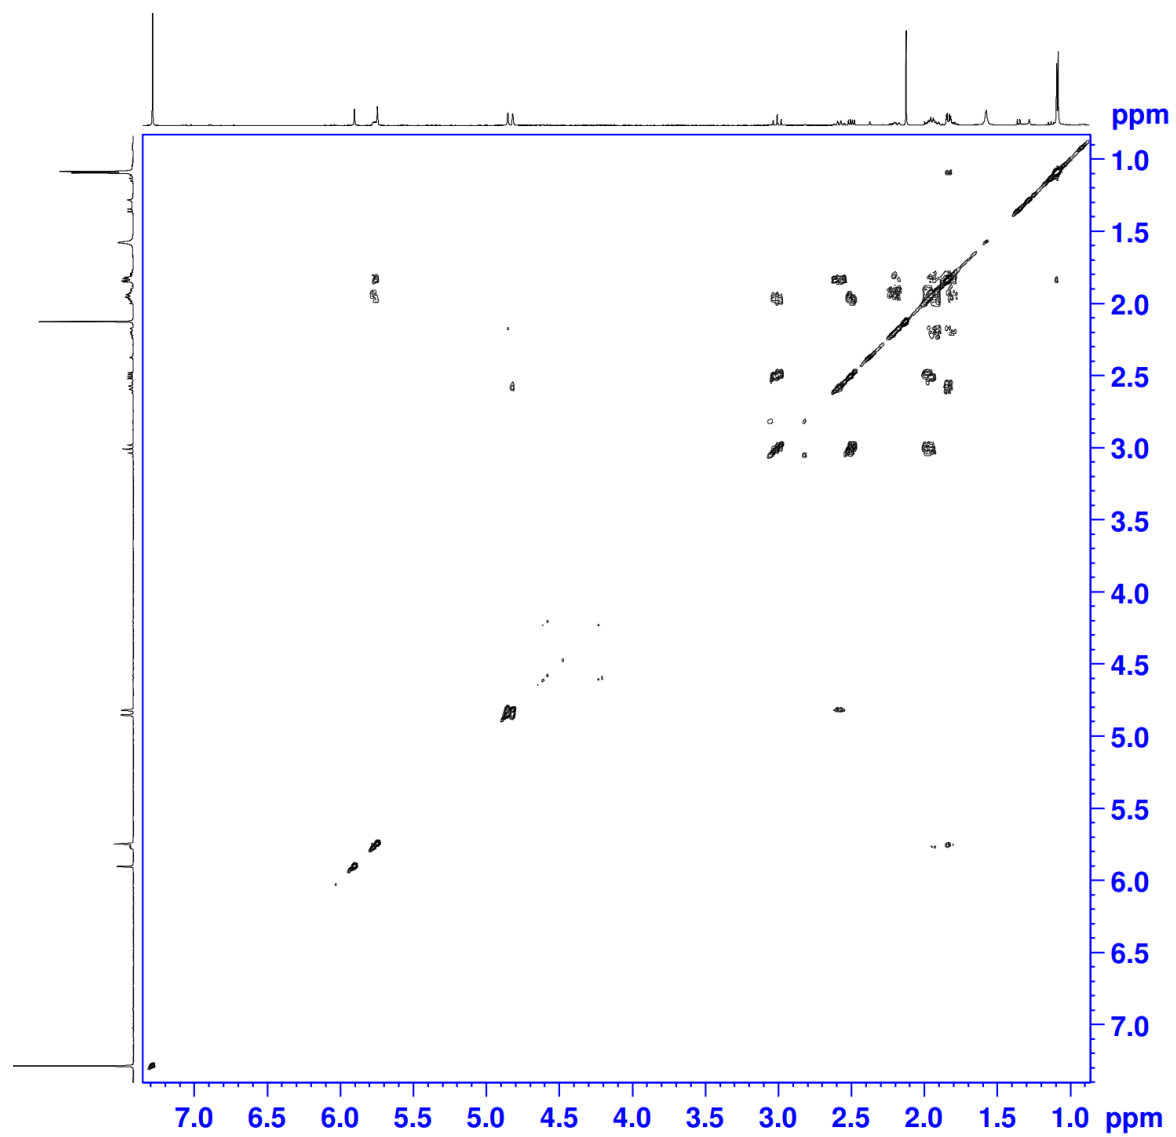

**Figure S4.**  $^1\text{H}$ - $^1\text{H}$  COSY spectrum of compound 2.

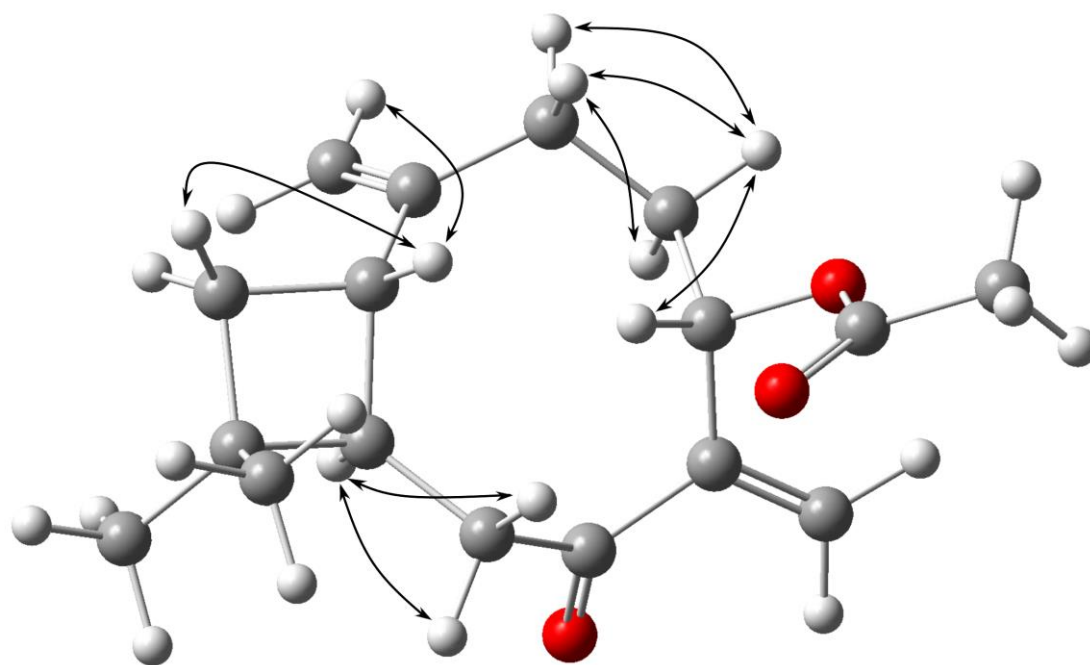

**Figure S5.** COSY correlations for compound **2**

Pracownia NMR  
Probka: pin4

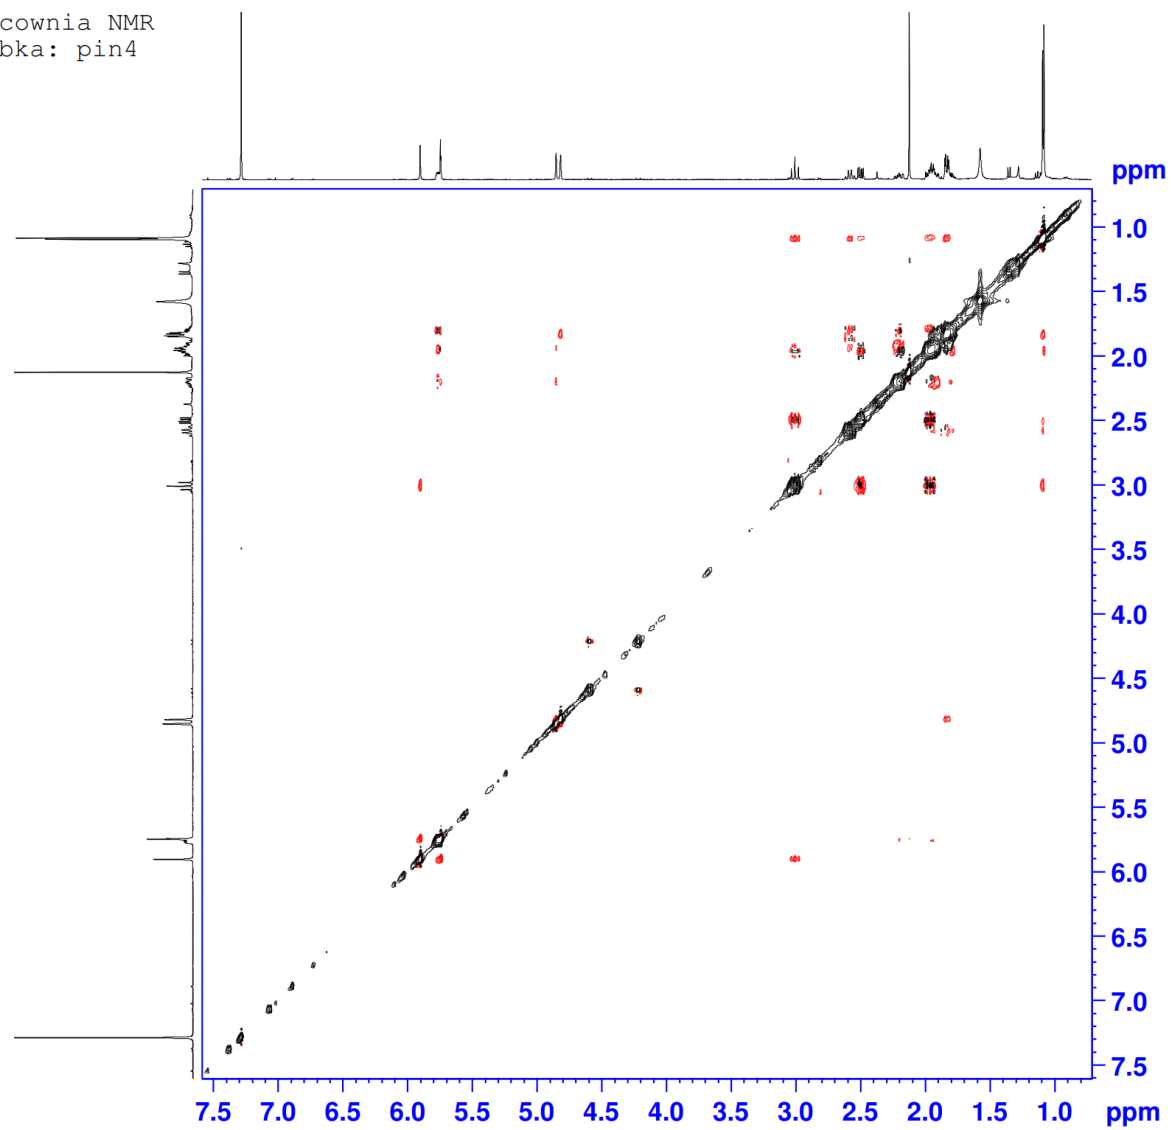

**Figure S6.** NOESY spectrum of compound **2**.

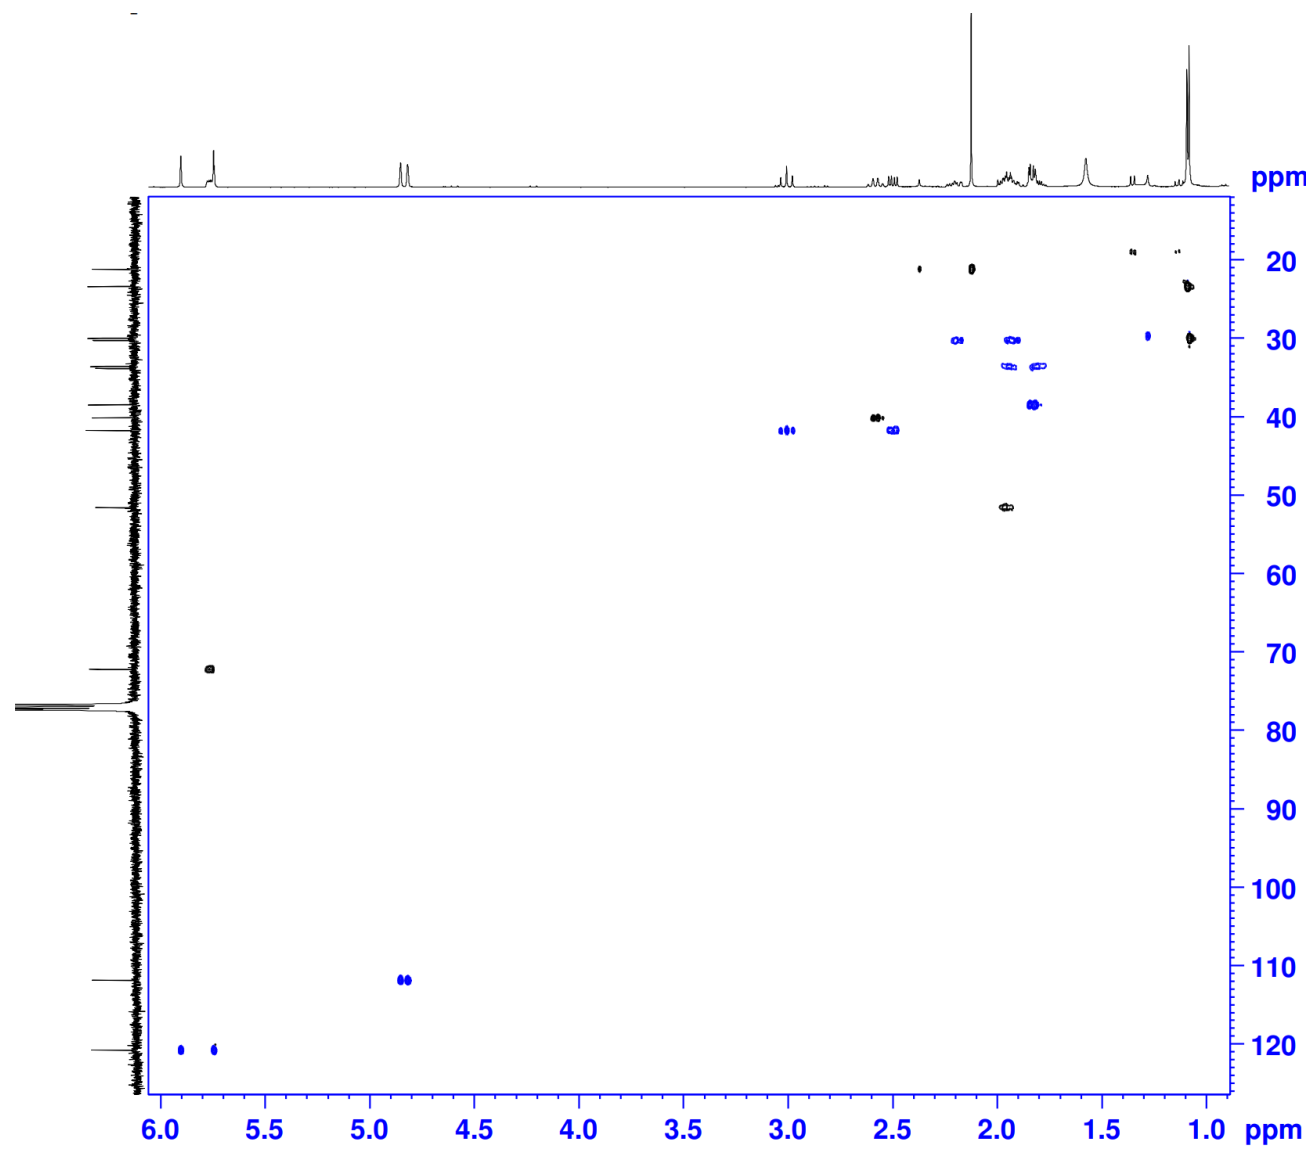

**Figure S7.** HSQC spectrum of compound **2**.



Probka: pin4

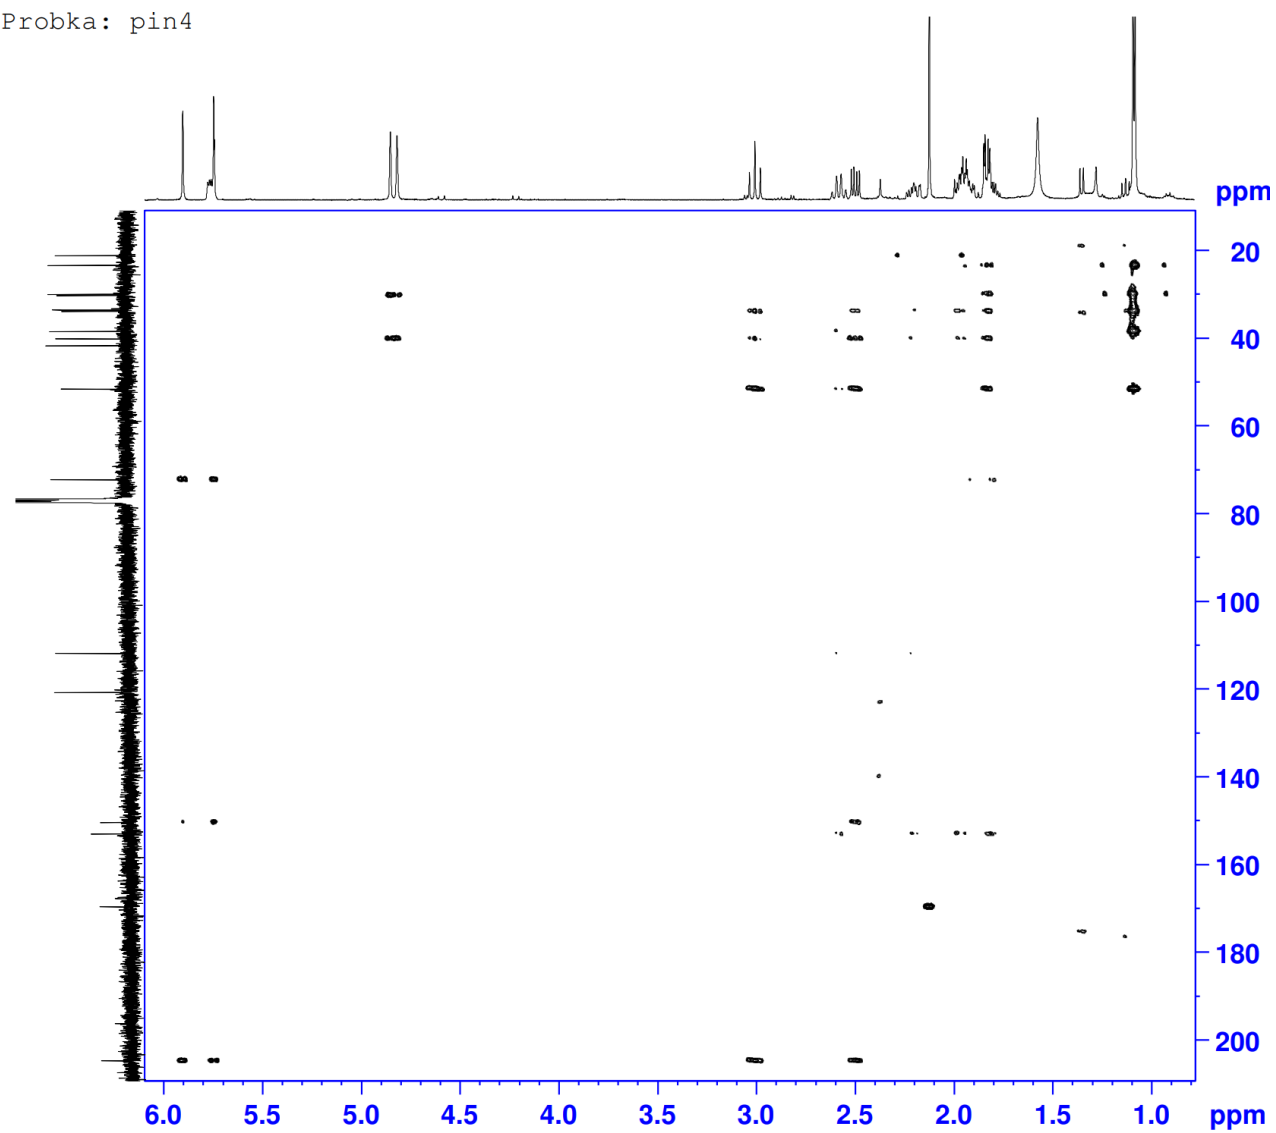

Figure S8. HMBC spectrum of compound 2.

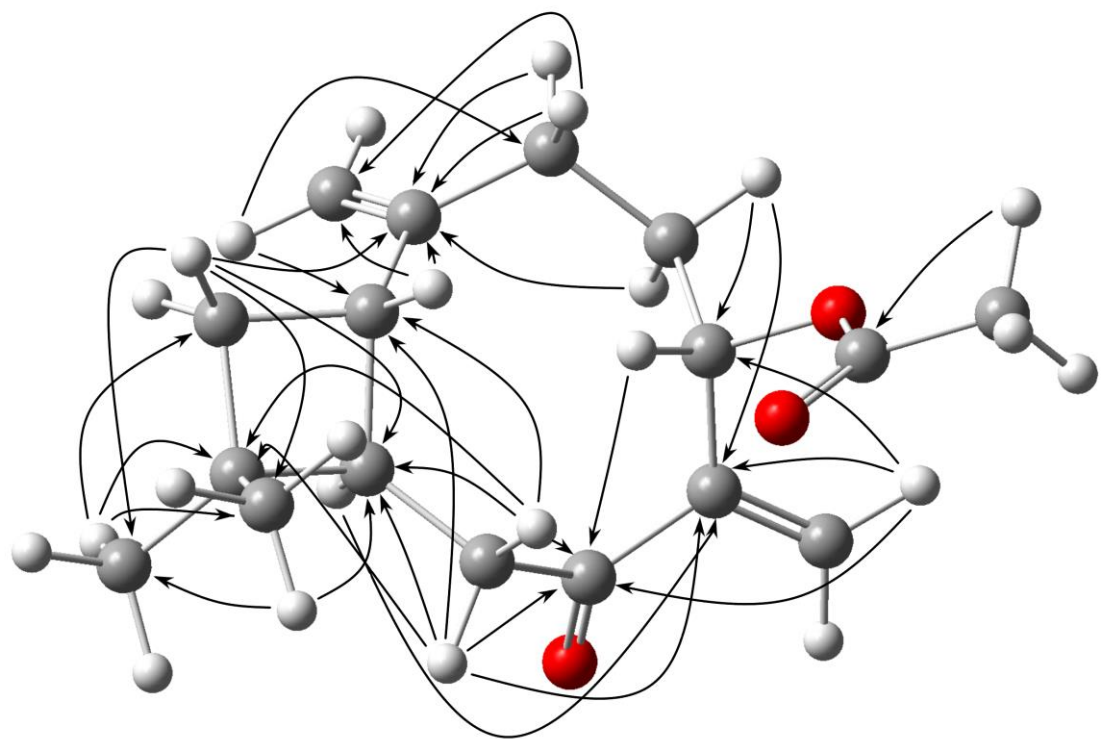

**Figure S9.** HMBC correlations for compound **2**

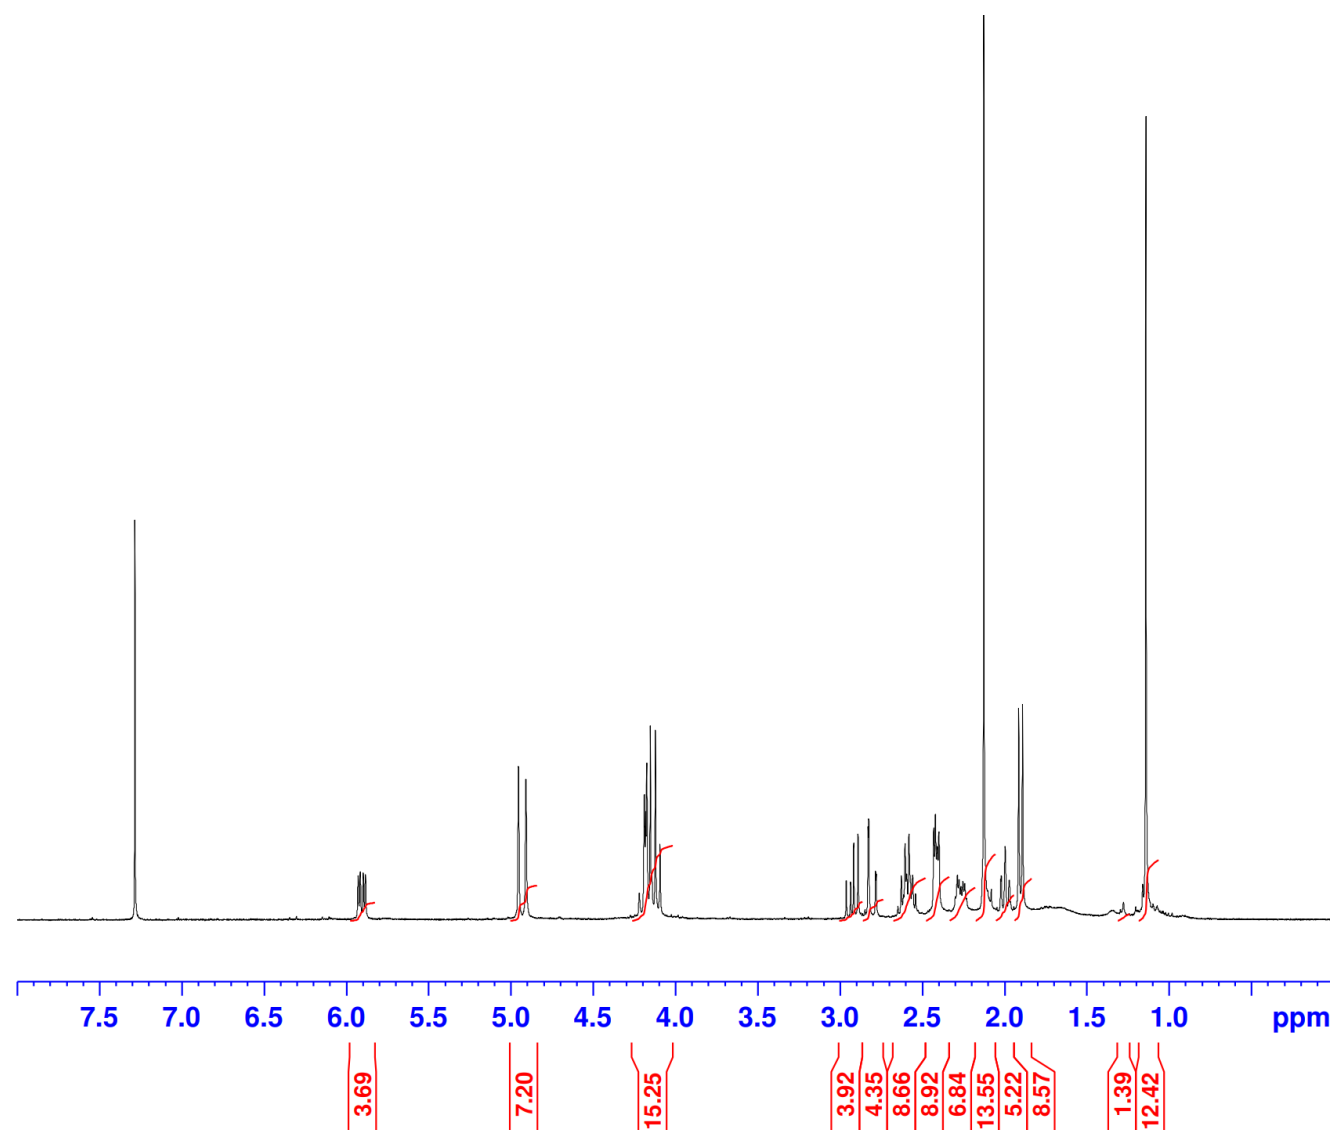

**Figure S10.**  $^1\text{H}$  NMR spectrum of compound **9** in  $\text{CDCl}_3$ .

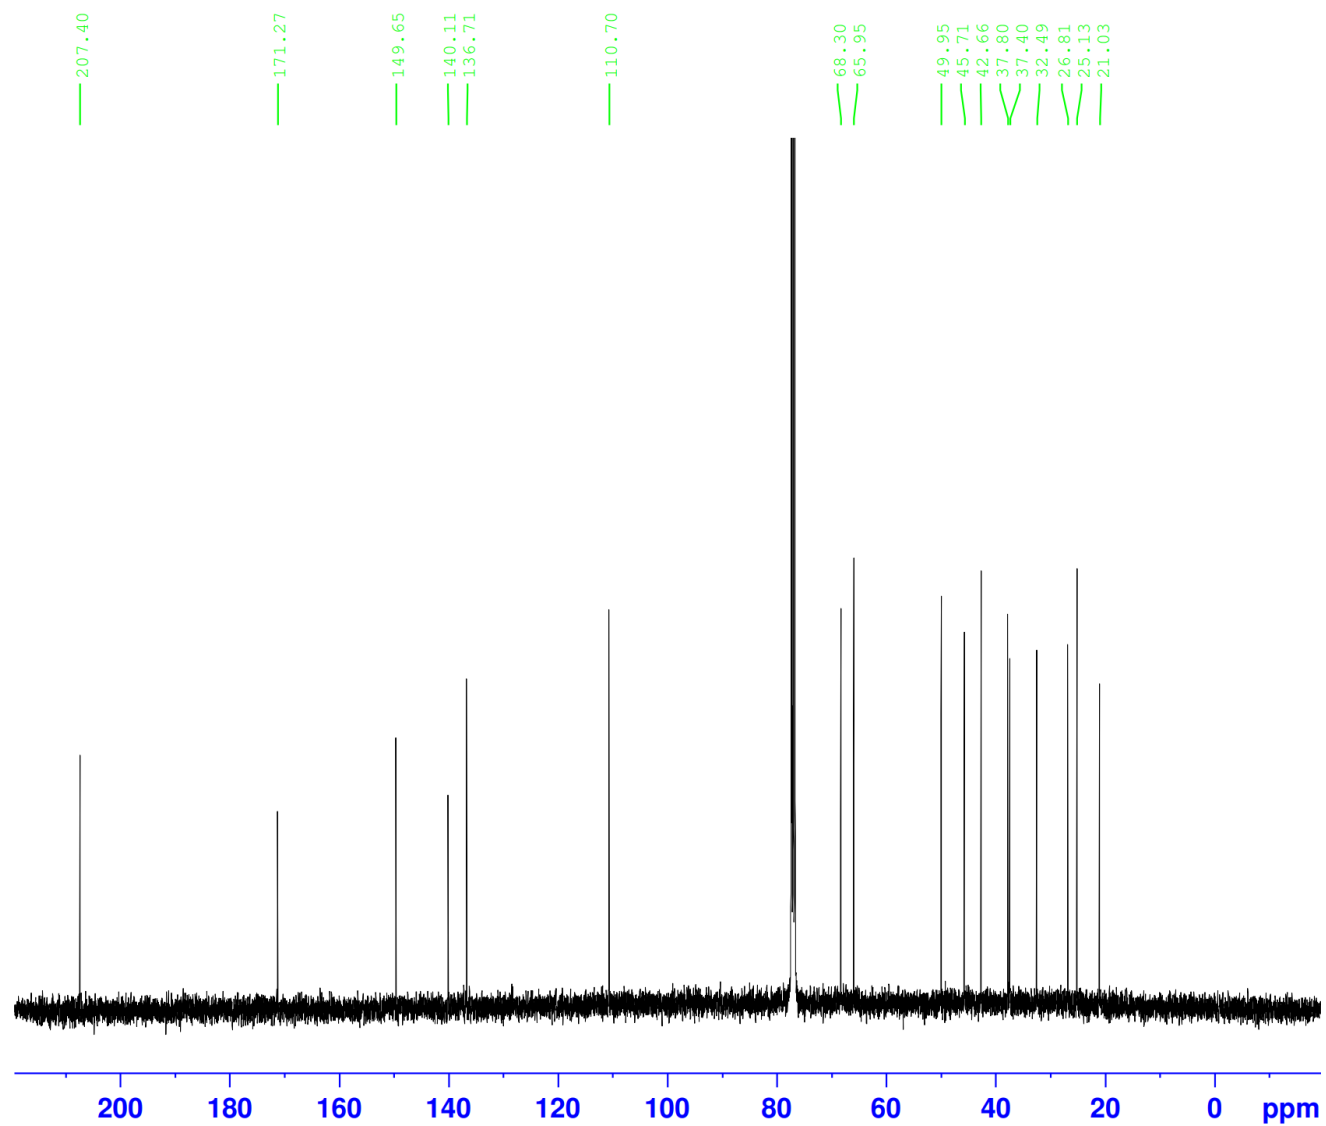

**Figure S11.** <sup>13</sup>C NMR spectrum of compound **9** in CDCl<sub>3</sub>.

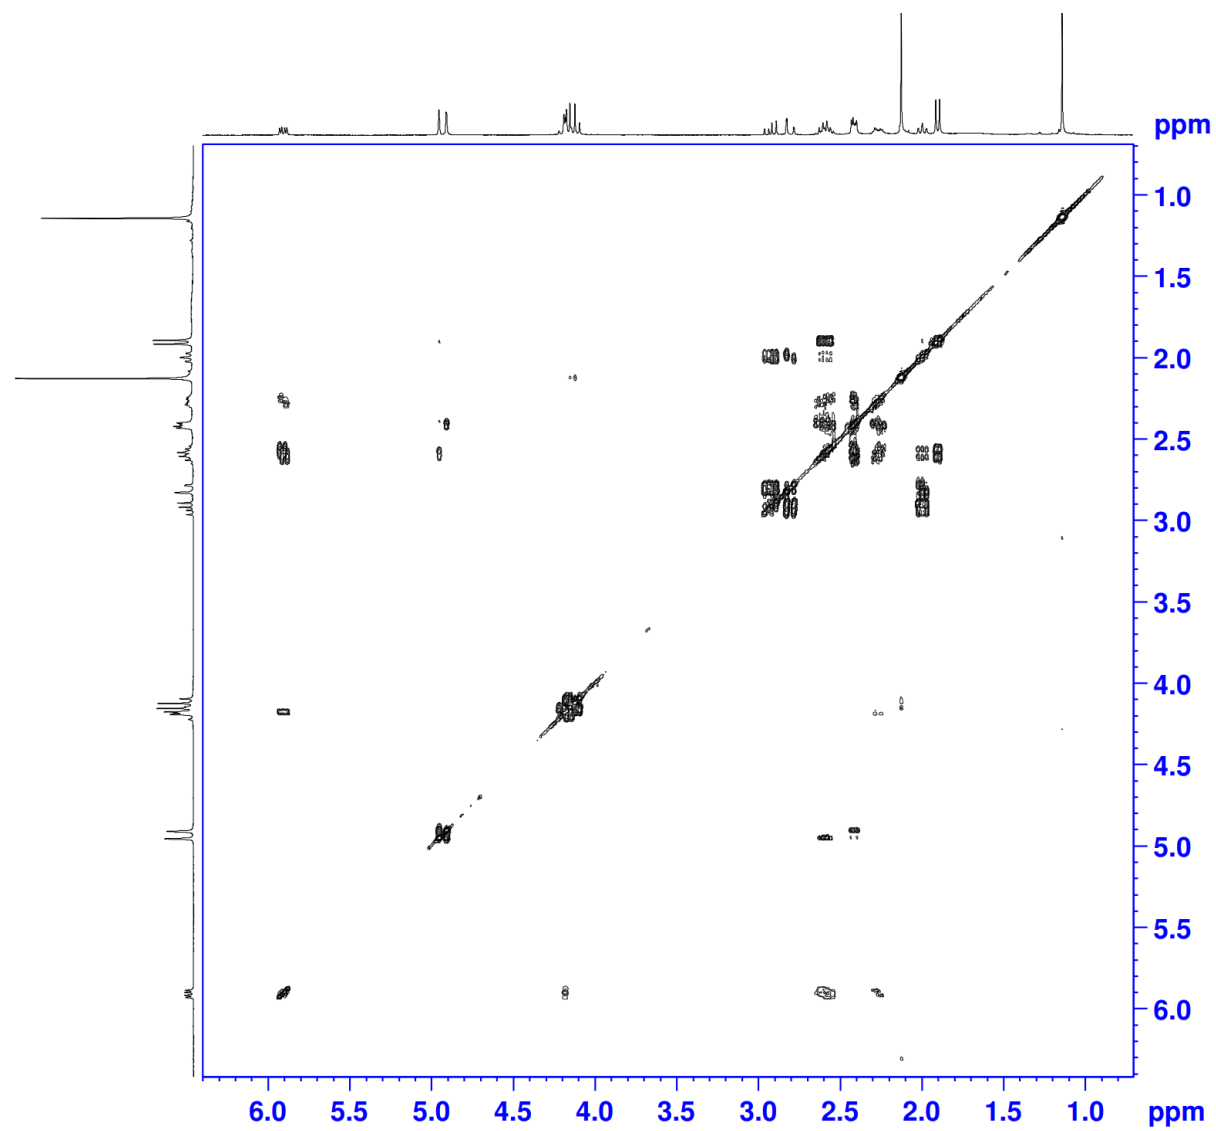

**Figure S12.**  $^1\text{H}$ - $^1\text{H}$  COSY spectrum of compound **9**.

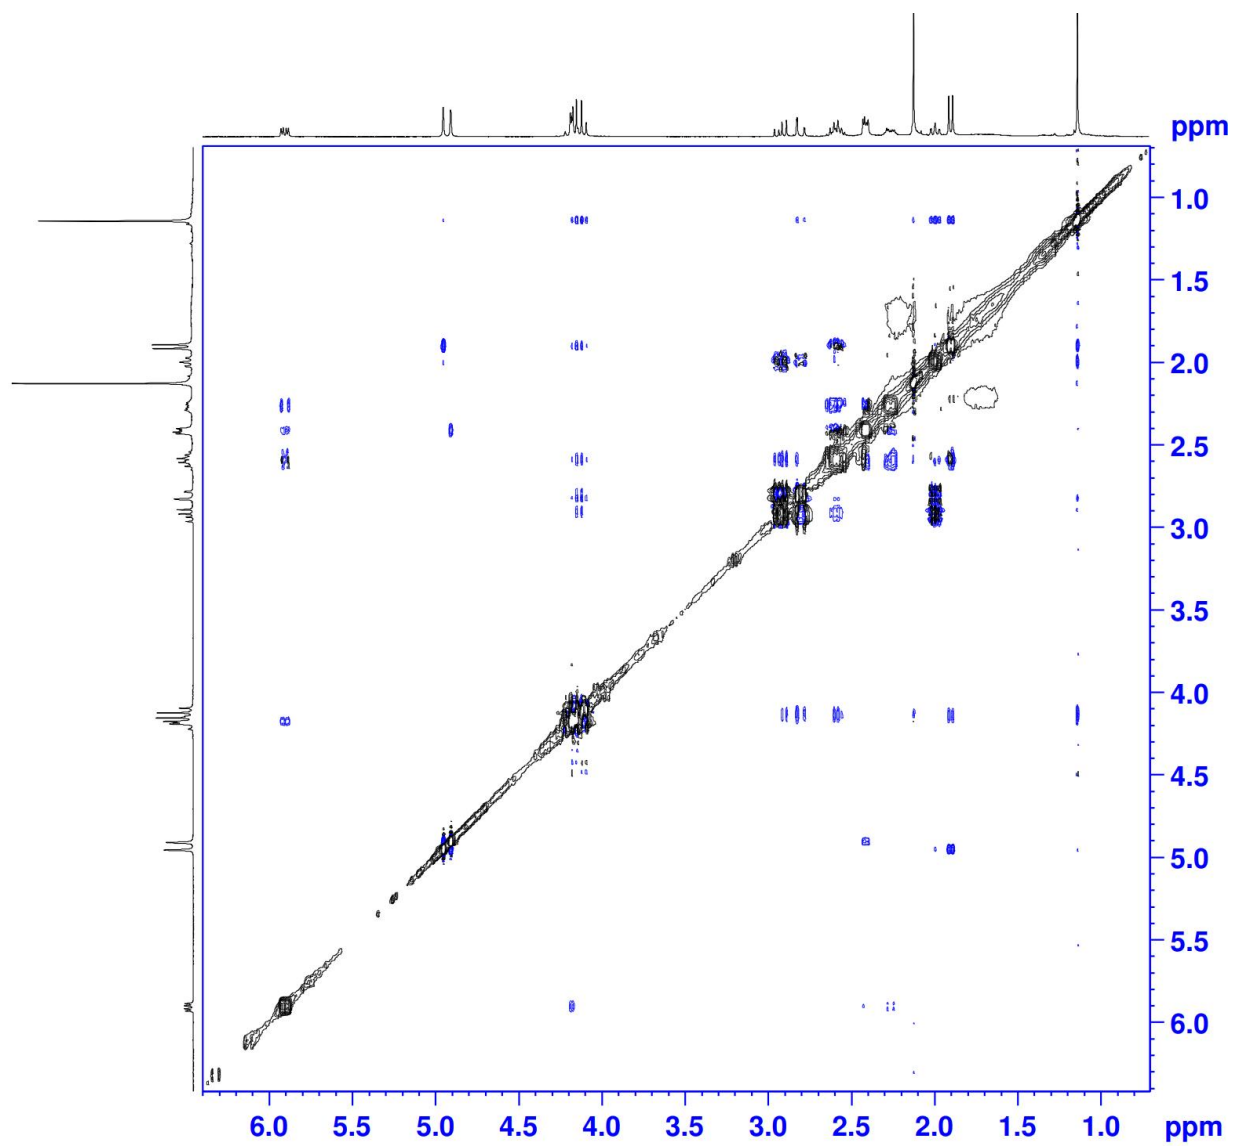

**Figure S13.** NOESY spectrum of compound **9**.

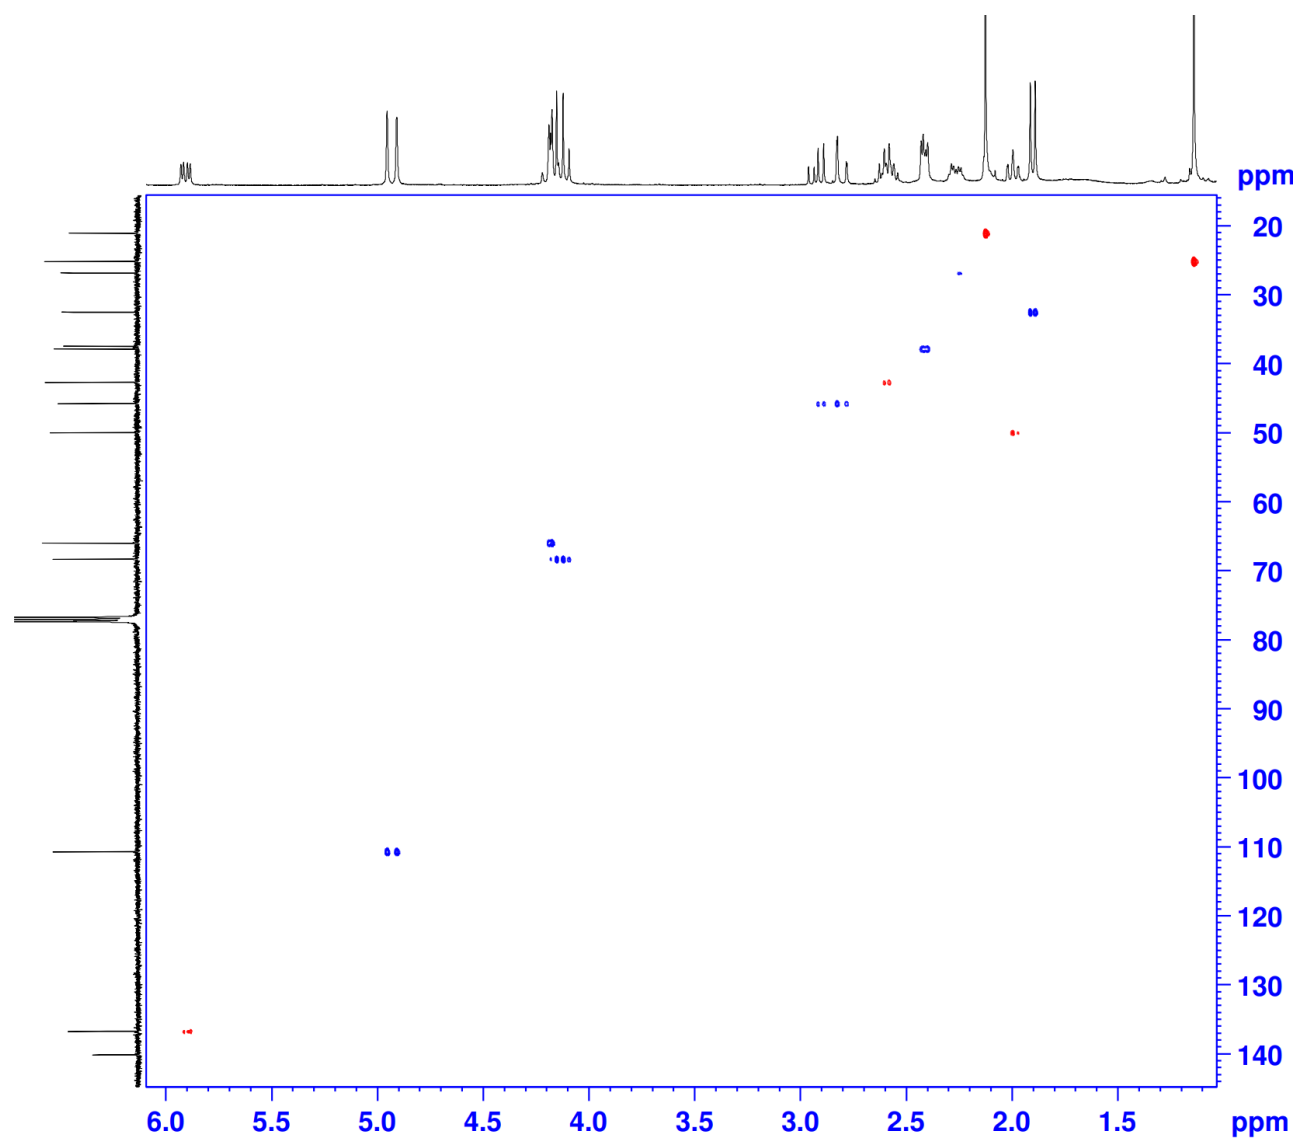

**Figure S14.** HSQC spectrum of compound **9**.

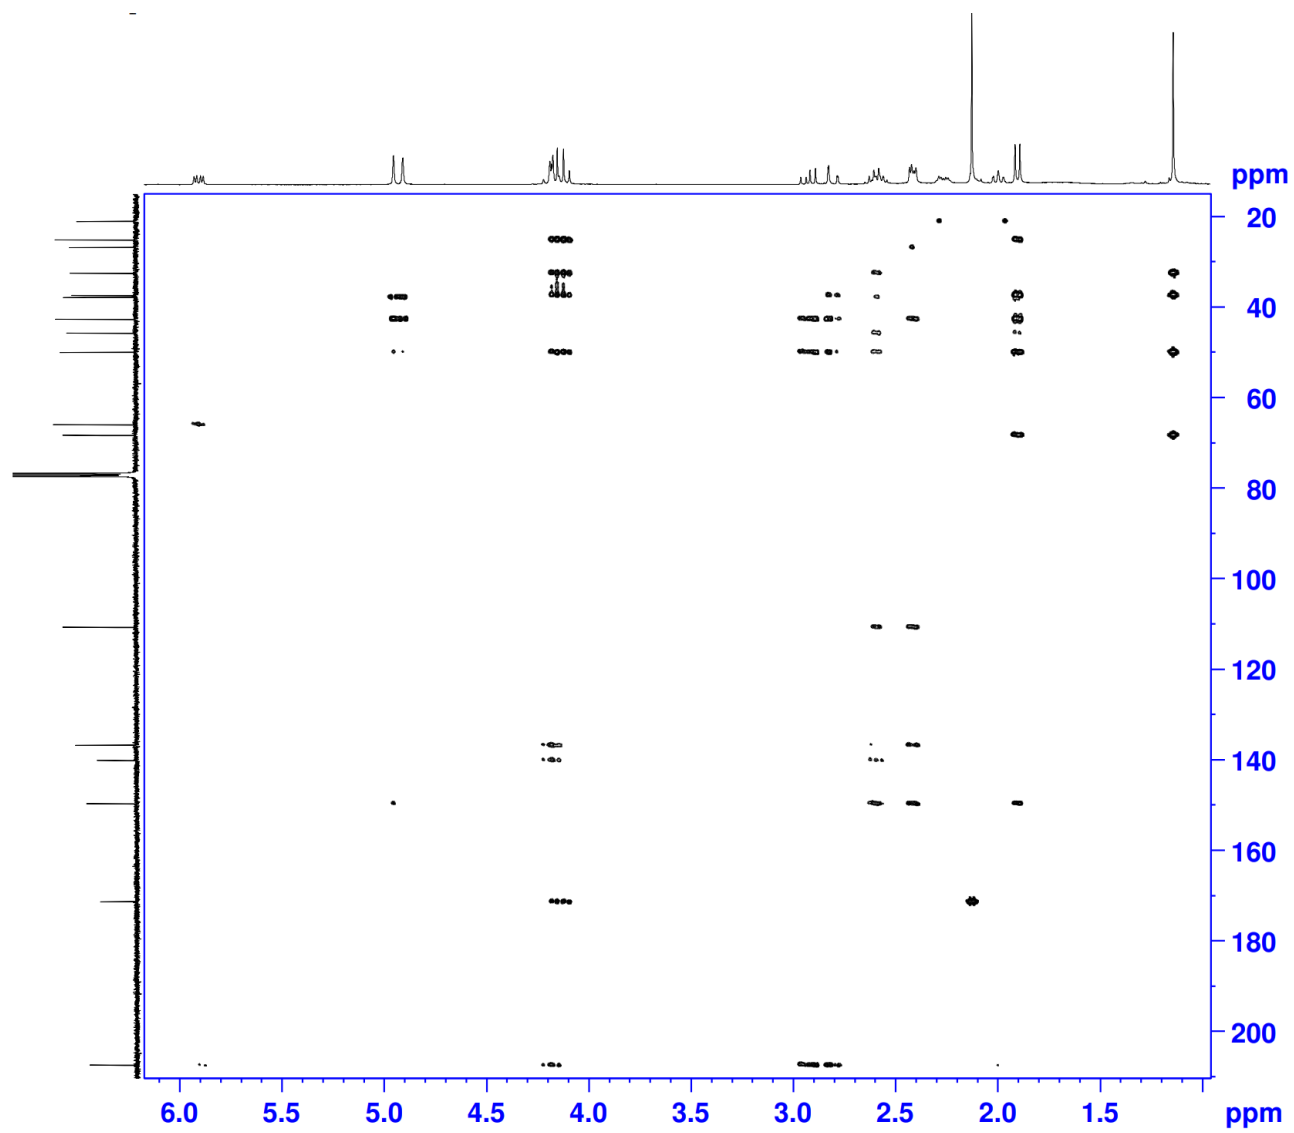

**Figure S15.** HMBC spectrum of compound **9**.



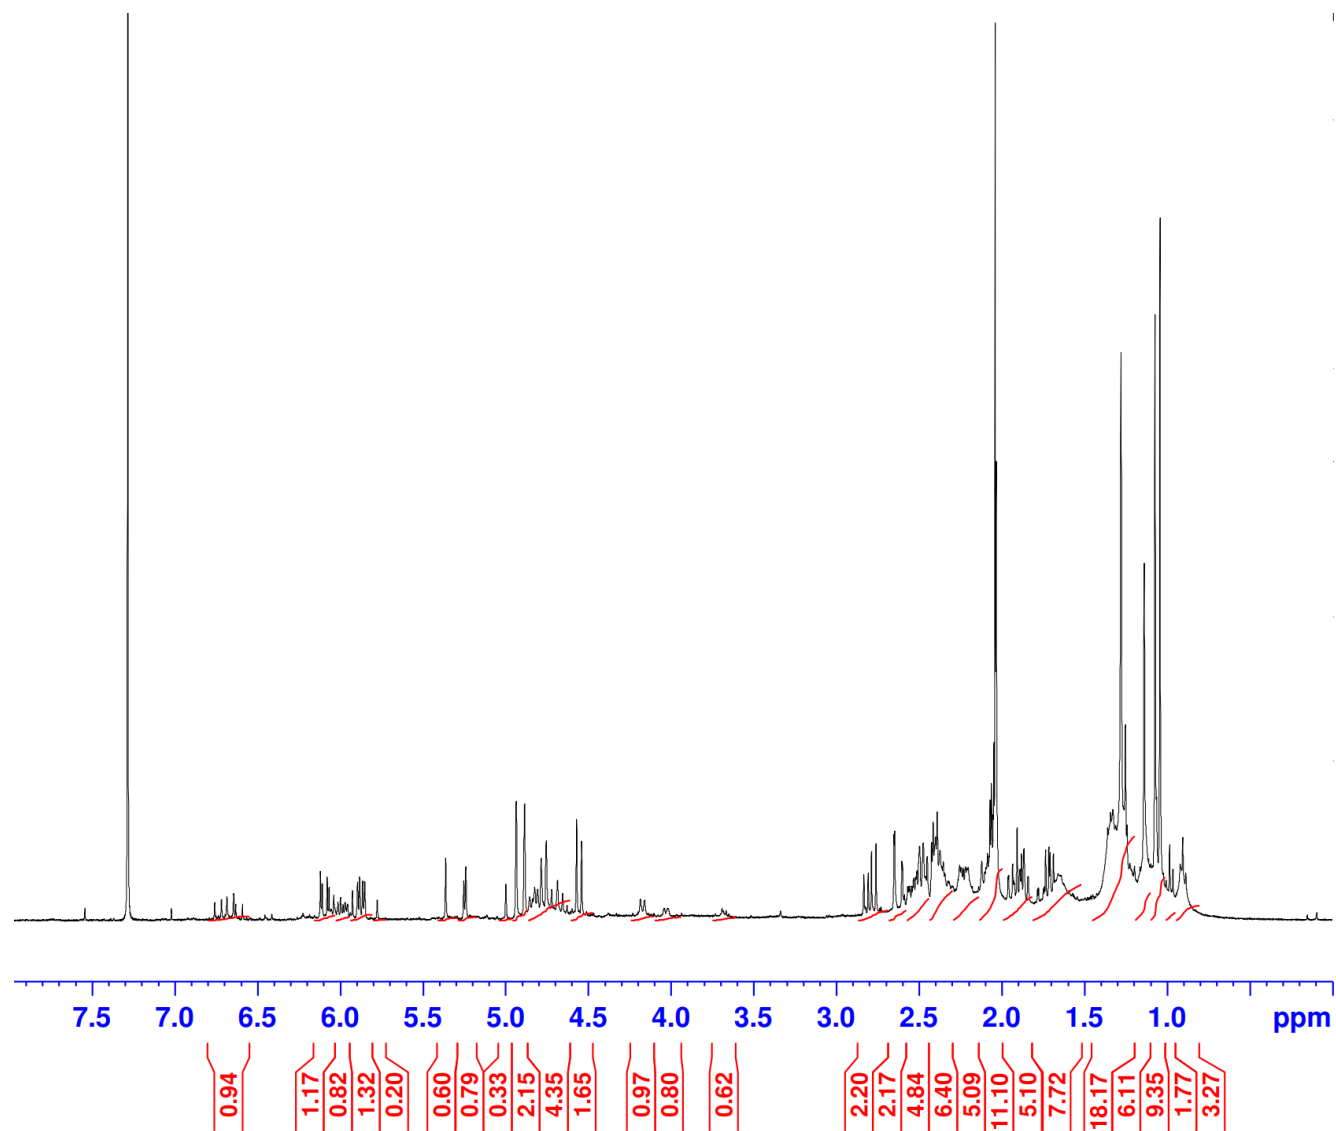

**Figure S16.**  $^1\text{H}$  NMR spectrum of the mixture containing compound **3** in  $\text{CDCl}_3$ .

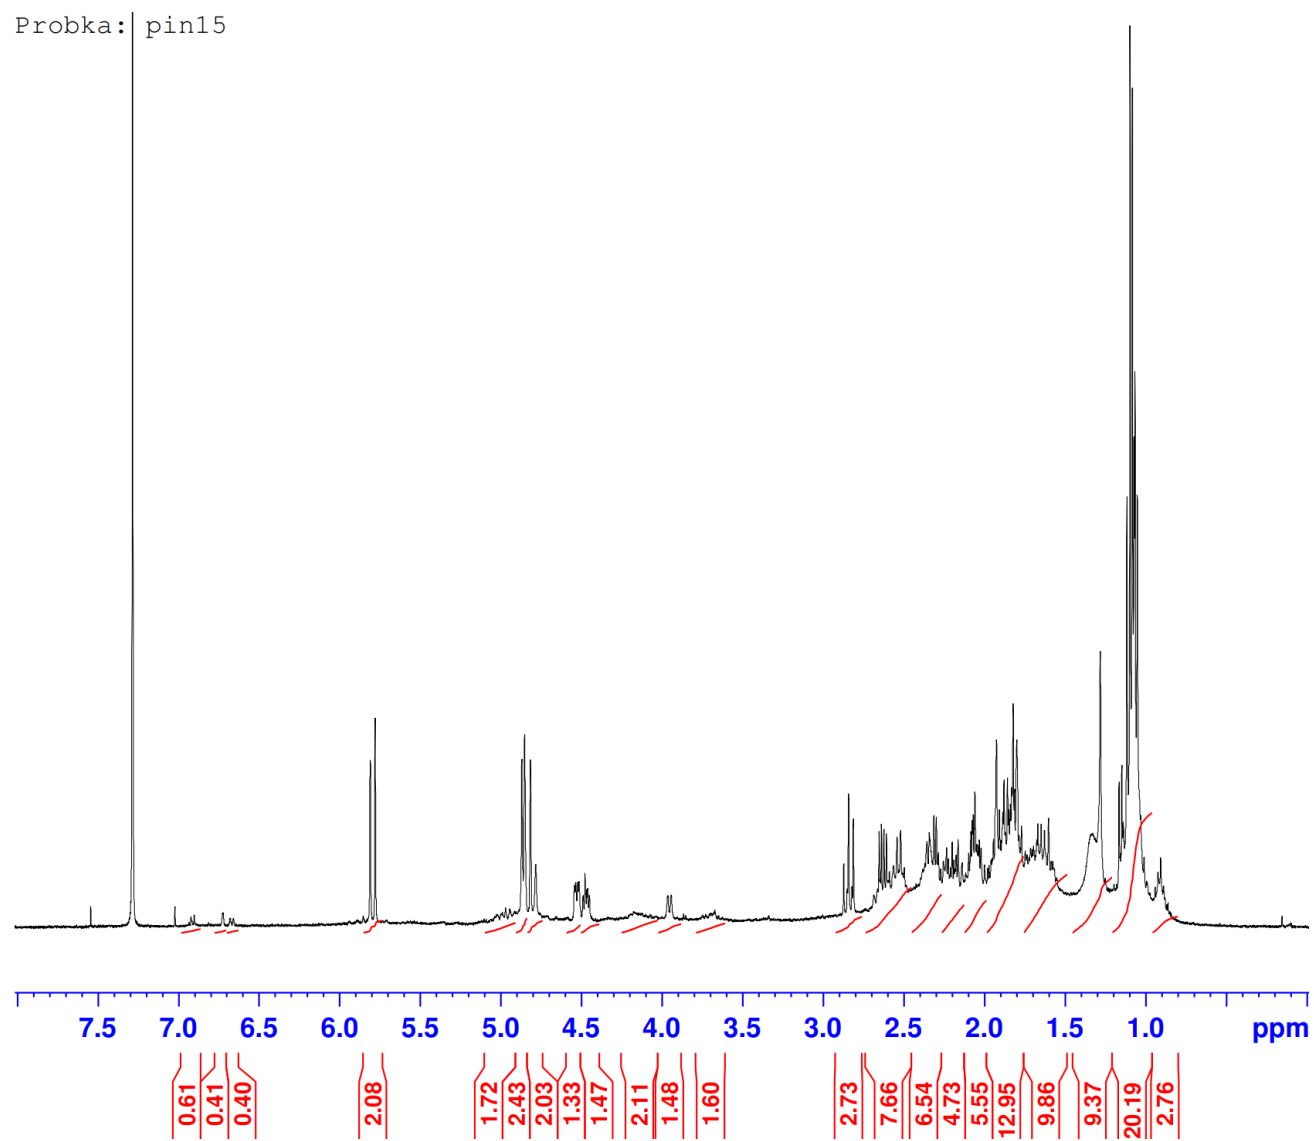

**Figure S17.**  $^1\text{H}$  NMR spectrum of compound **7** in  $\text{CDCl}_3$ .

Probka: pin17

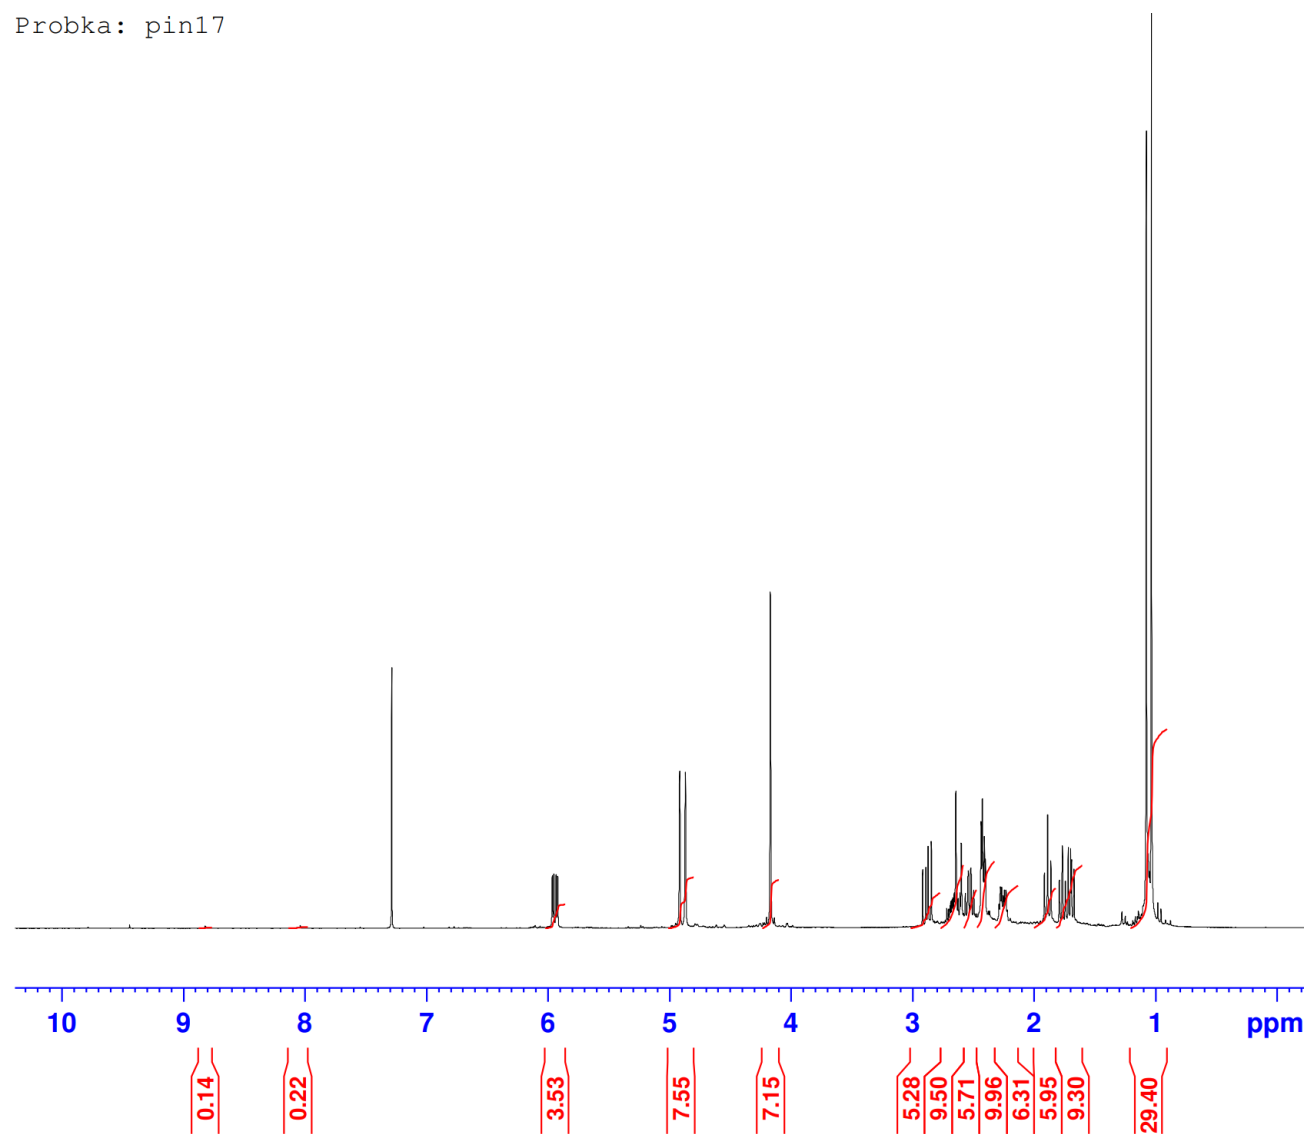

**Figure S18.**  $^1\text{H}$  NMR spectrum of compound **8** in  $\text{CDCl}_3$ .

Pracownia NMR  
Probka: pin3

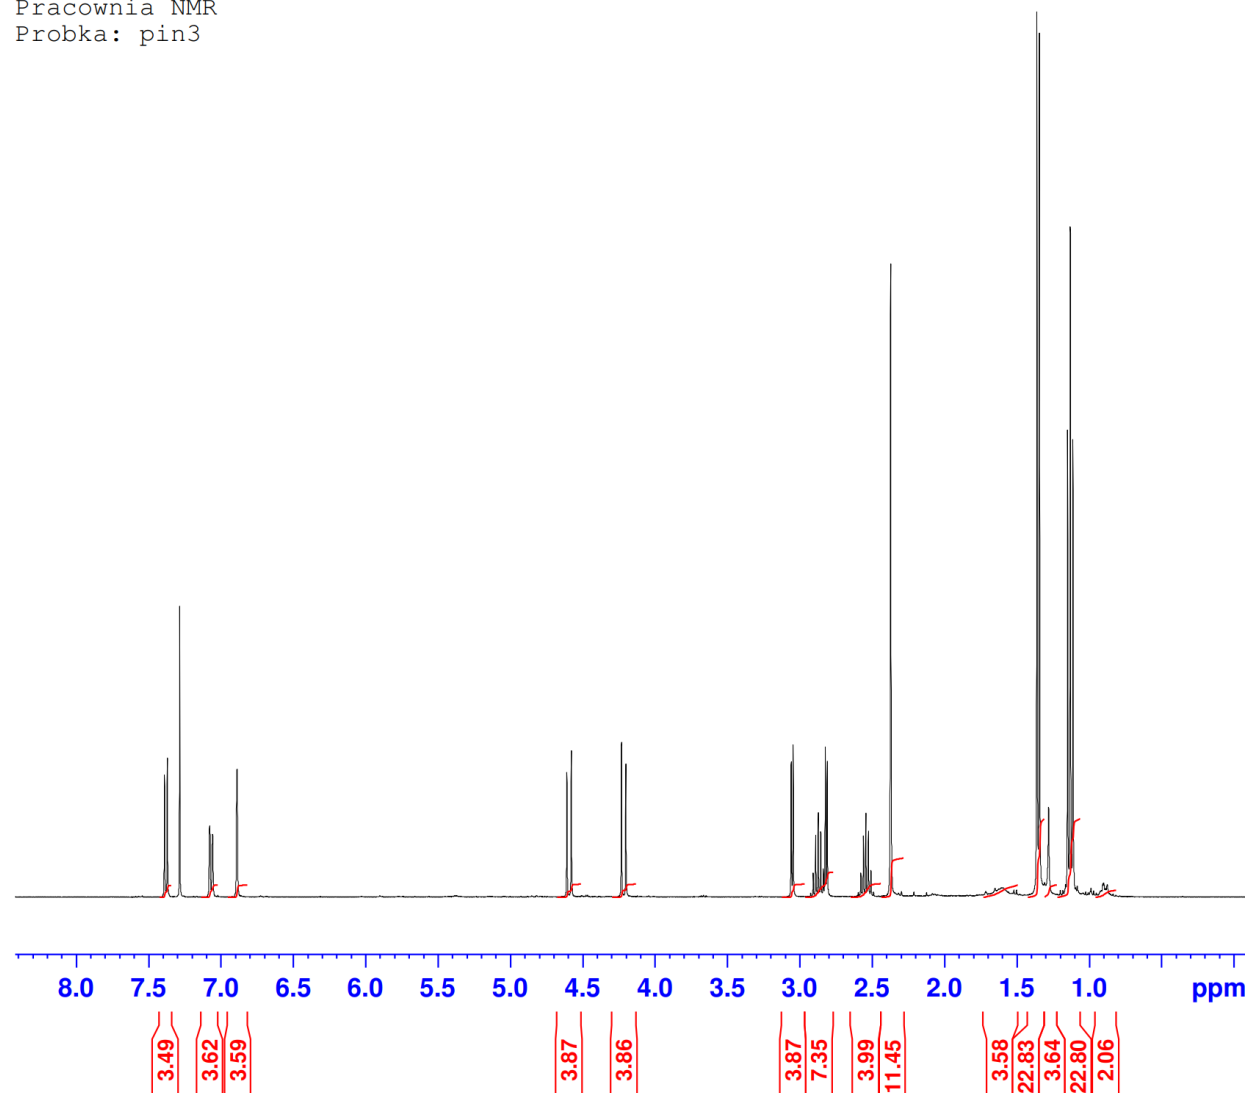

**Figure S19.**  $^1\text{H}$  NMR spectrum of compound **1** in  $\text{CDCl}_3$ .

Pracownia NMR  
Probka: pin14

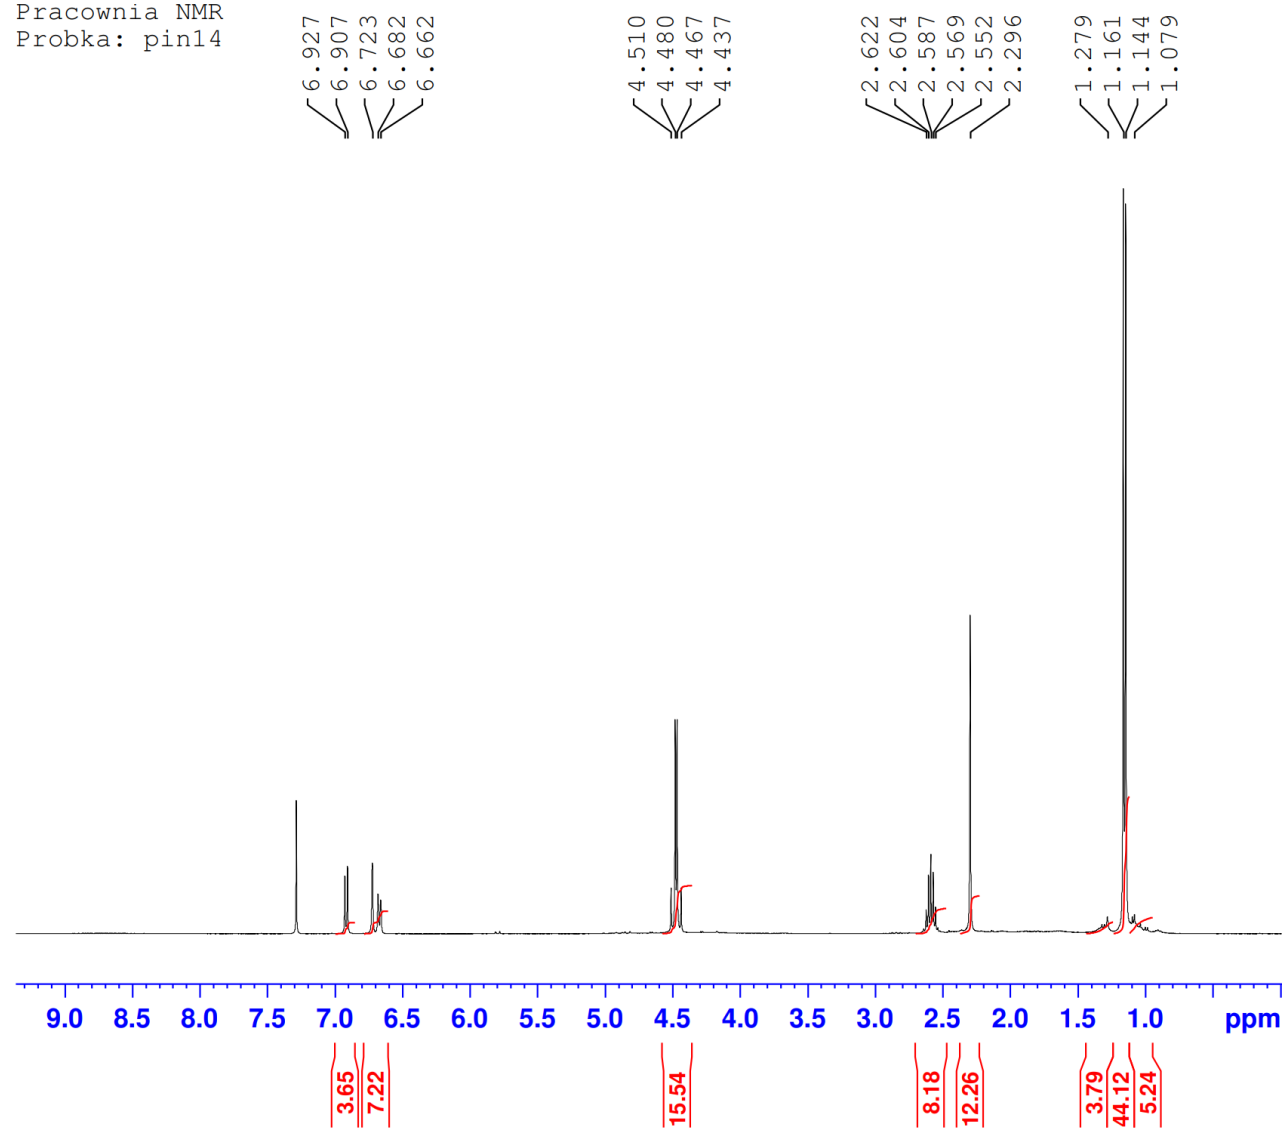

**Figure S20.**  $^1\text{H}$  NMR spectrum of compound **4** in  $\text{CDCl}_3$ .

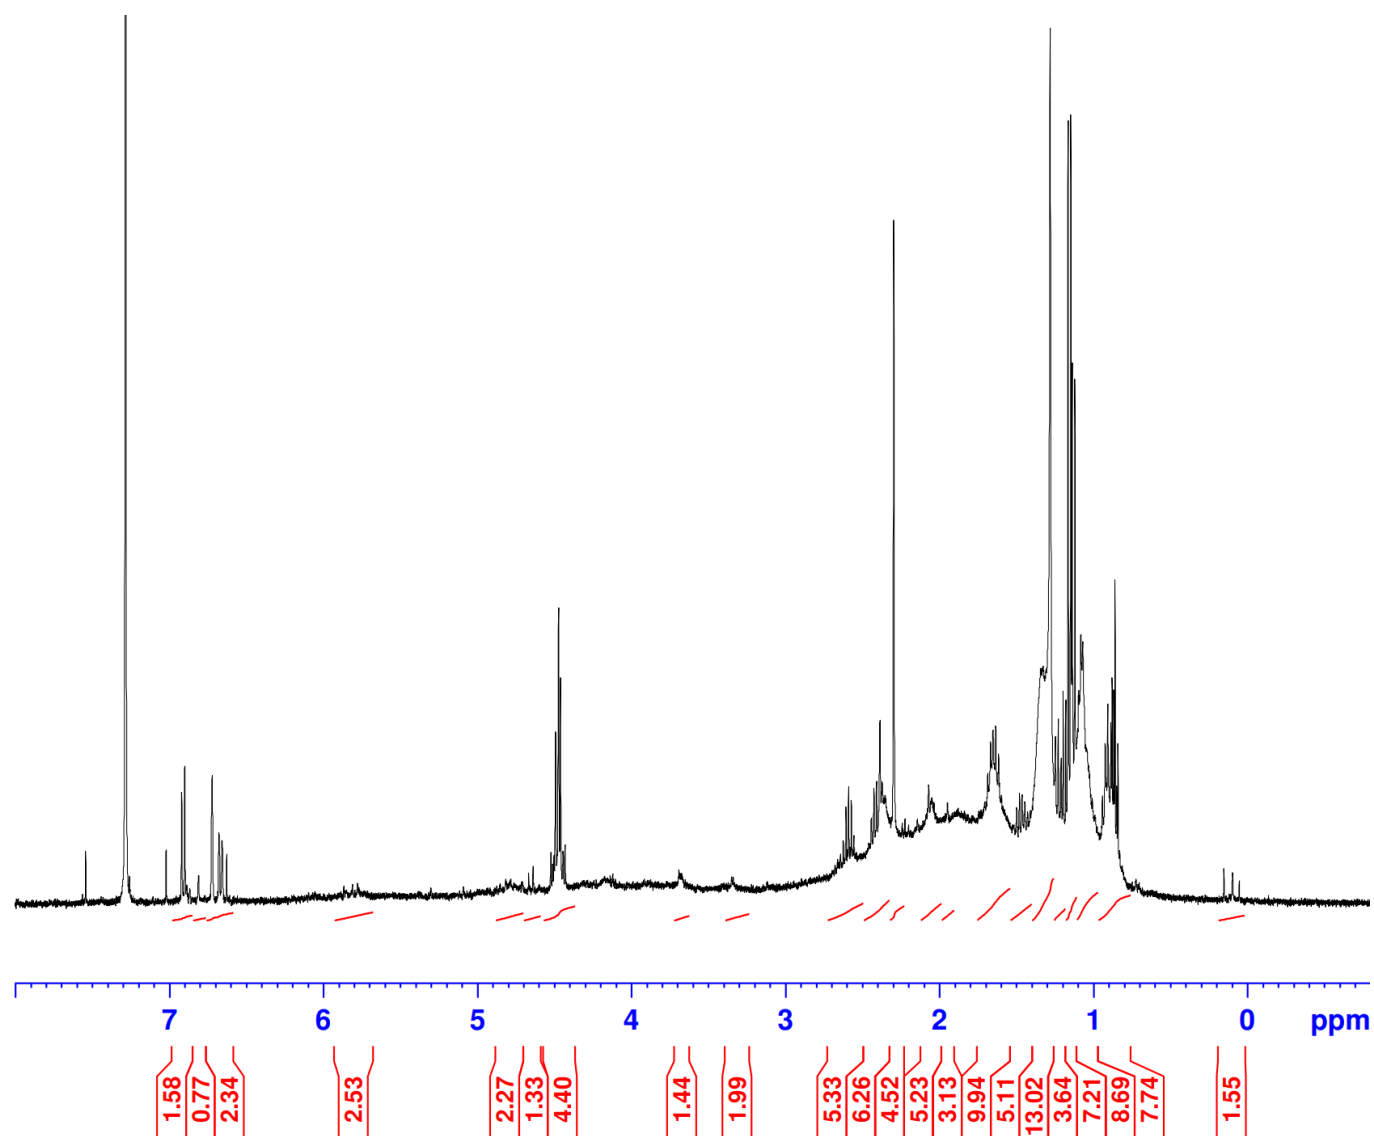

**Figure S21.**  $^1\text{H}$  NMR spectrum of compound **5** in  $\text{CDCl}_3$ .

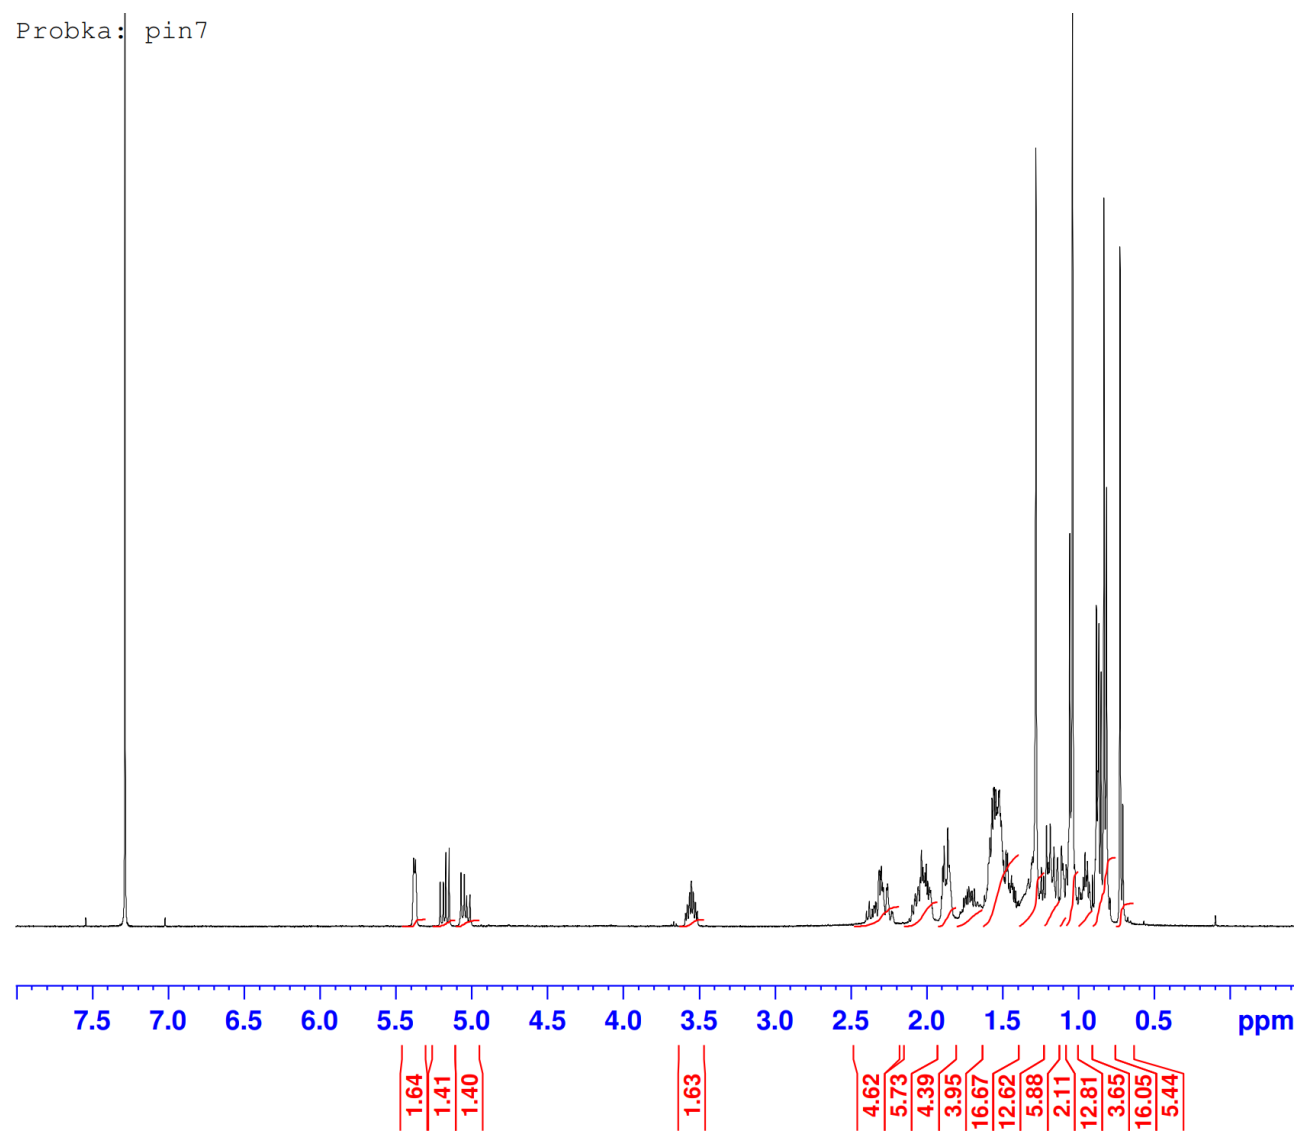

**Figure S22.**  $^1\text{H}$  NMR spectrum of compound **6** in  $\text{CDCl}_3$ .

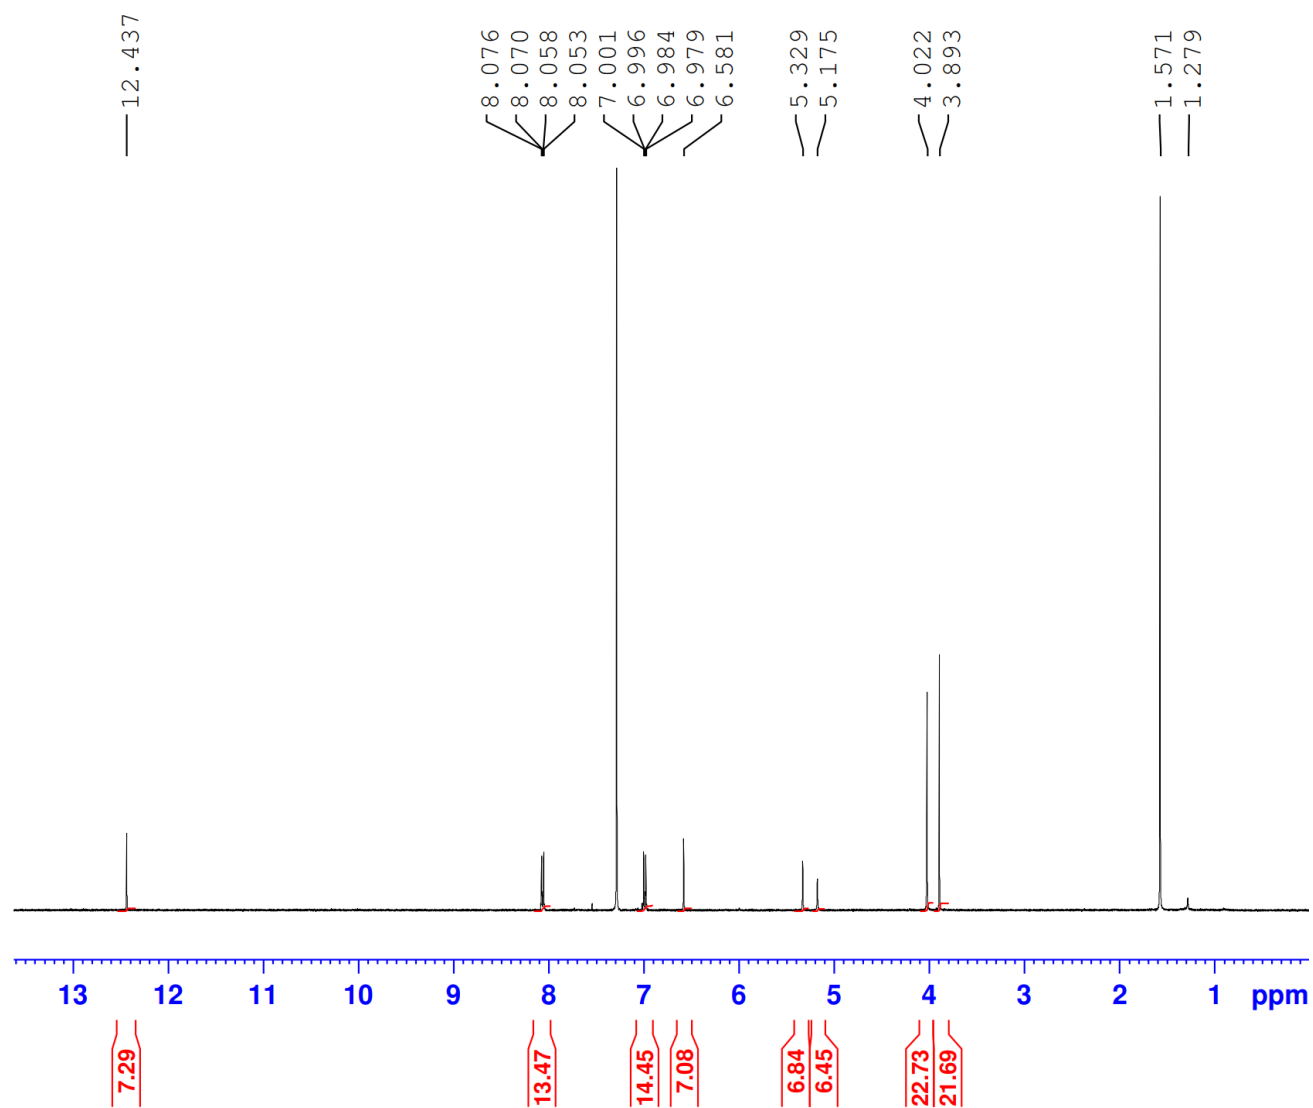

**Figure S23.** <sup>1</sup>H NMR spectrum of compound **10** in CDCl<sub>3</sub>.



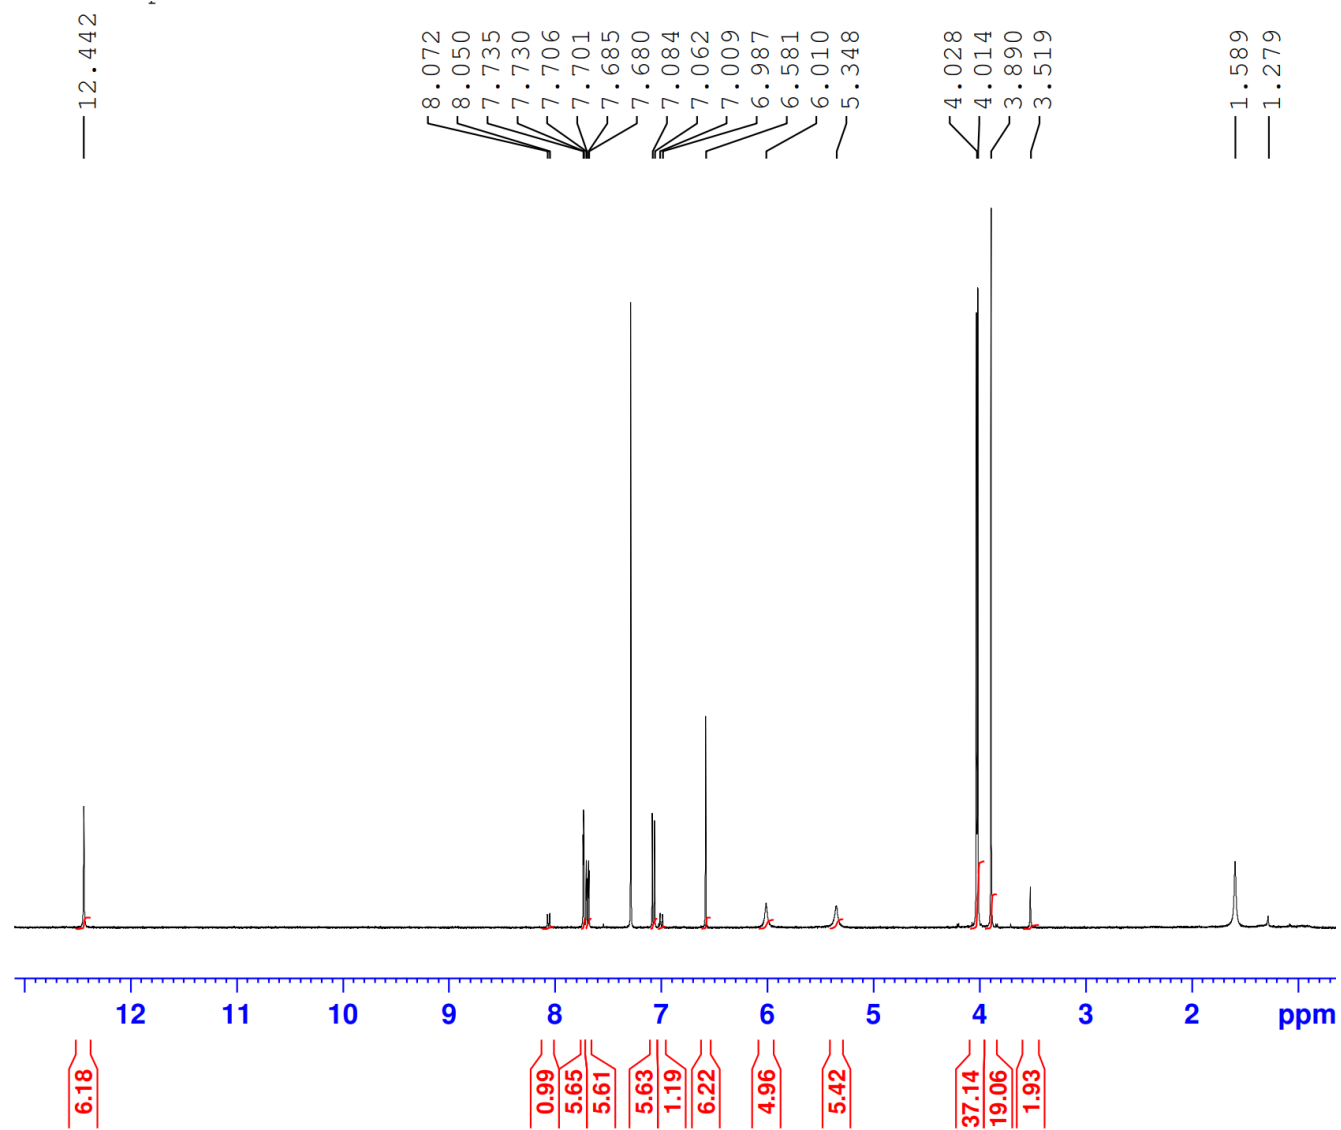

**Figure S24.** <sup>1</sup>H NMR spectrum of compound **11** in CDCl<sub>3</sub>.

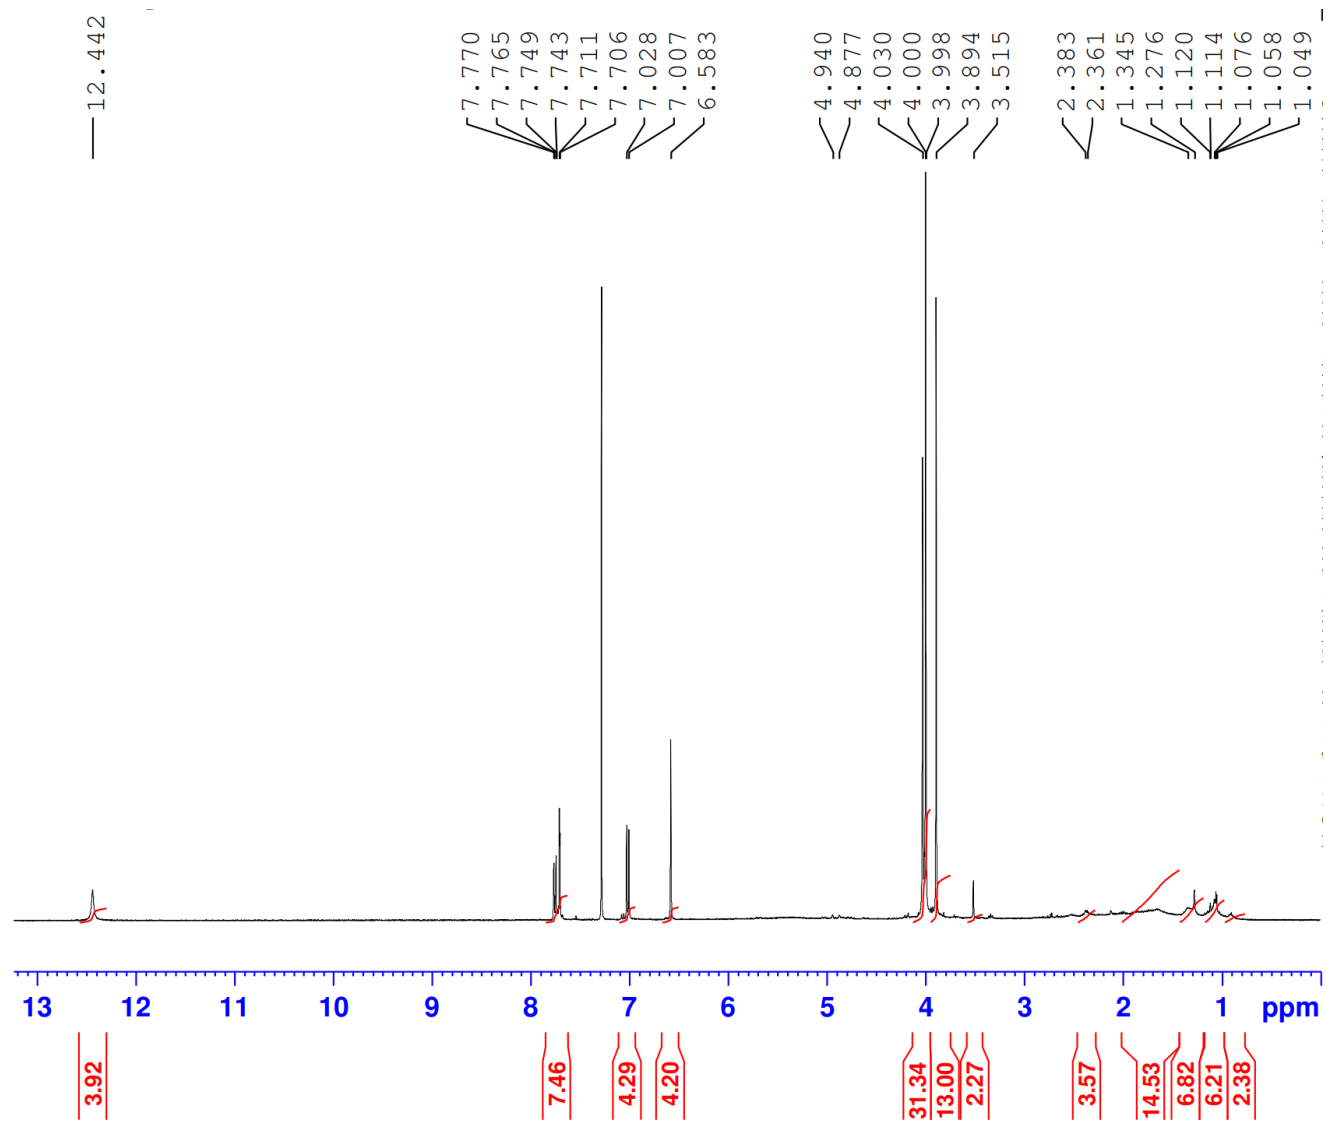

**Figure S25.** <sup>1</sup>H NMR spectrum of compound **12** in CDCl<sub>3</sub>.

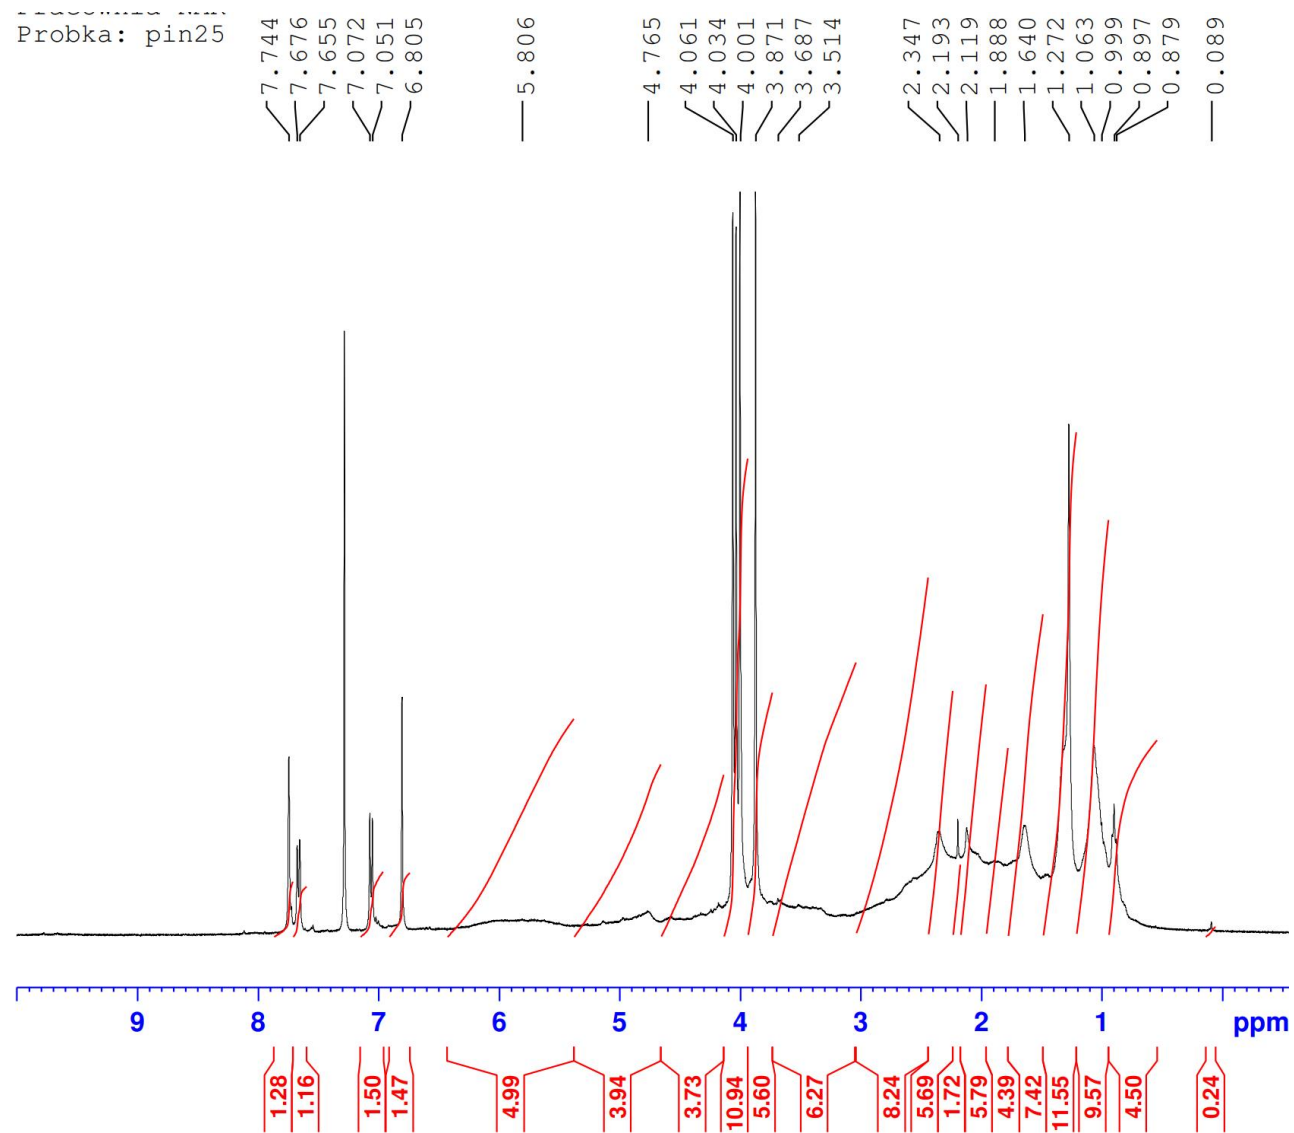

**Figure S26.**  $^1\text{H}$  NMR spectrum of compound **13** in  $\text{CDCl}_3$ .

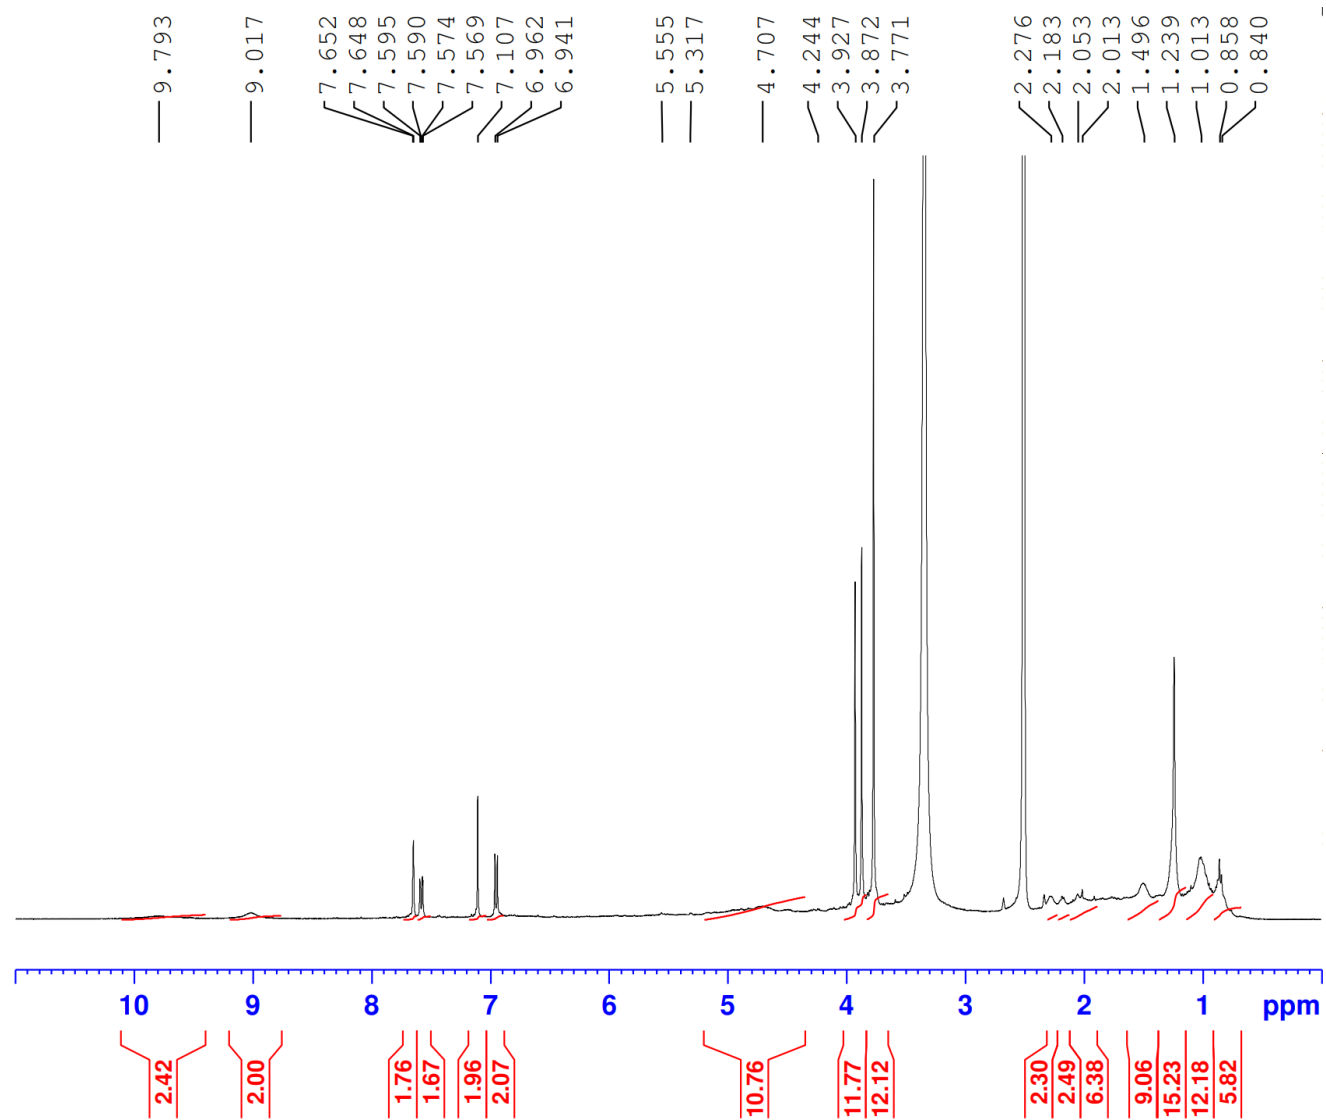

**Figure S27.** <sup>1</sup>H NMR spectrum of compound **13** in DMSO-d<sub>6</sub>.
